# Passenger Hotspot Mutations in Cancer

Julian M. Hess<sup>a</sup>, Andre Bernards<sup>b,c</sup>, Jaegil Kim<sup>a</sup>, Mendy Miller<sup>a</sup>, Amaro Taylor-Weiner<sup>a</sup>, Nicholas J. Haradhvala<sup>a,b</sup>, Michael S. Lawrence<sup>a,c,d,e,\*</sup>, Gad Getz<sup>a,c,d,e,\*\*</sup>

<sup>a</sup>The Broad Institute of MIT and Harvard, Cambridge, Massachusetts 02142, USA

<sup>b</sup>Center for Cancer Research, Massachusetts General Hospital, Boston, Massachusetts, USA 02114

<sup>c</sup>Harvard Medical School, 250 Longwood Avenue, Boston, 02115, MA, USA

<sup>d</sup>Department of Medicine, Massachusetts General Hospital, Boston, Massachusetts 02114, USA

<sup>e</sup>Department of Pathology, Massachusetts General Hospital, Boston, Massachusetts 02114, USA

---

## Abstract

Hotspots, or mutations that recur at the same genomic site across multiple tumors, have been conventionally interpreted as strong universal evidence of somatic positive selection, unequivocally pinpointing genes driving tumorigenesis. Here, we demonstrate that this convention is falsely premised on an inaccurate statistical model of background mutagenesis. Many hotspots are in fact passenger events, recurring at sites that are simply inherently more mutable rather than under positive selection, which current background models do not account for. We thus detail a log-normal-Poisson (LNP) background model that accounts for variation in site-specific mutability in a manner consistent with models of mutagenesis, use this model to show that the tendency to generate passenger hotspots pervades all common mutational processes, and apply it to a ~10,000 patient cohort from The Cancer Genome Atlas to nominate driver hotspots with far fewer false positives compared to conventional methods. As the biomedical community faces critical decisions in prioritizing putative driver mutations for deep experimental characterization to assess therapeutic potential, we offer our findings as a guide to avoid wasting valuable scientific resources on passenger hotspots.

---

## 1. Introduction

The genome of a cell lineage continually accrues mutations over time. The vast majority of mutations are either selectively neutral “passengers” that leave the lineage phenotypically unaltered, or else selectively negative events that result in slower growth or cell death. However, rare selectively positive mutations (“drivers”) that increase a cell’s proliferative fitness occasionally occur. Such a cell may go on to acquire additional driver events that enable it to outcompete its neighbors, eventually multiplying into a tumor (Cairns, 1975; Stratton et al., 2009).

Selectively positive mutations accumulate in tumor suppressors and oncogenes. These cancer driver genes are recurrently mutated across patients, and can be identified on the basis of having mutational densities significantly above the background passenger density. This requires accurate estimation of the mutational background, a task complicated by its considerable heterogeneity (Hodgkinson and Eyre-Walker, 2011). Some genomic elements are recurrently mutated due not to positive selection but simply to their higher mutability (e.g., late-replicating regions) (Hodgkinson and Eyre-Walker, 2011; Stamatoyannopoulos et al., 2009; Pleasance et al., 2010). Over the past decade, the field has developed increasingly sophisticated statistical models (Lawrence et al., 2013; Weghorn and Sunyaev, 2017; Martincorena et al., 2017; Lawrence et al., 2014; Dees et al., 2012; Getz et al., 2007) to infer and account for the heterogeneous mutational background. This has increased power and specificity to distinguish true drivers (with an ex-

cess of positively selected mutations) from false positives (with increased mutation density due to high background mutability alone).

Some of the best-known oncogenes are recurrently mutated at exactly the same amino acid position in many patients: for instance, the V600E mutation in *BRAF*, and mutations at G12, G13, or Q61 in *RAS* genes. These hotspot mutations have been experimentally validated as oncogenic (Davies et al., 2002; Field and Spandidos, 1990). Inspired by these examples, many methods for detecting driver events use exact positional recurrence as a signal of positive selection. This requires a model of background mutability at the site-specific level. The prevailing assumption has been that all equivalent base-pairs within a particular gene (e.g., all sites with the same *k*-mer sequence context) have the same background probability of being mutated. Thus, it is unlikely to observe by chance many patients sharing mutations at a particular base-pair in a gene while the other equivalent base-pairs of the gene remain unmutated. This leads to the conventional assumption that sites with multiple mutations across cancer (i.e., mutational hotspots) *must* reflect true driver events and that there are no “passenger hotspots.”

Here, we present evidence to the contrary. In the same way that certain regions of the genome are more highly mutated than others, and certain fragile sites of the genome are more prone to breakage (e.g., in genes such as *WWOX*, *FHIT*, and others (Schrock and Huebner, 2015; Mitsui and Tsuji, 2012)), it appears that certain individual base-pairs in the genome are more highly mutable, simply because they are more vulnerable to damage and/or more refractory to repair. We first show that the majority of recurrently mutated sites are under no positive selection by examining the dis-

---

\*Correspondence: [mLawrence@mgh.harvard.edu](mailto:mLawrence@mgh.harvard.edu)

\*\*Correspondence: [gadgetz@broadinstitute.org](mailto:gadgetz@broadinstitute.org)

tribution of their protein-coding effects (i.e., nonsense, missense, synonymous). We then demonstrate pervasive heterogeneity in the background mutability of individual base-pairs in the exome beyond what can be explained by known genomic features, and introduce a model that accounts for this base-level heterogeneity, allowing true cancer driver hotspots to rise to the top of the list above the numerous passenger hotspots that form at base-pairs with high intrinsic mutability. We use this new model to detect novel driver hotspots and discuss their potential biological functions. Finally, we quantify the extent of base-level heterogeneity of various mutational signatures, such as those associated with APOBEC enzyme hyperactivity, loss of mismatch repair or polymerase proofreading, or mutagens such as ultraviolet light or tobacco smoke. Surprisingly, we find that most mutational processes show a similar amount of heterogeneity in base-pair mutability. This may reflect intrinsic properties of the genome, or ubiquitous repair mechanisms, rather than shared properties of mutagens.

## 2. Results

To identify significantly mutated hotspots, we must first be able to statistically estimate position-specific mutation frequencies. This requires a large cohort of very high-quality somatic mutation calls, since small cohorts are underpowered to accurately estimate base-level mutation frequencies, and poor-quality mutation calls typically contain recurrent sequencing artifacts or germline polymorphisms that can severely distort base-level analyses. Here, we examined a cohort of 9,023 quality-controlled whole-exome-sequenced tumor-normal pairs spanning 32 tumor types, generated by the The Cancer Genome Atlas (TCGA) MC3 mutation-calling initiative (Eilrott et al., 2018) (STAR Methods), a dataset containing a total of 2,288,080 somatic single-nucleotide variations (sSNVs).

### 2.1. Discovering significant hotspots based on a statistical model of the site-specific background mutational frequency

Candidate driver hotspots are discovered by identifying sites with a significant excess of mutations beyond the background frequency. Because we do not know the true background mutation frequency of each genomic position *a priori*, we must approximate it with a statistical model. Regardless of the model, a common approach to find significantly mutated bases (i.e., “hotspots”) is to compare the observed number of mutations across a cohort at a given site to the distribution of the expected number of mutations predicted by the background model, generating a *p*-value for that site. Sites passing multiple-hypothesis correction (e.g., false discovery rate [FDR] *q*-value  $\leq 0.1$ ) are then considered significant hotspots. Obviously, what gets called statistically significant is only biologically meaningful if the underlying statistical approximation of the true background mutation frequency is accurate. Although we cannot directly evaluate the underlying model’s overall accuracy since we lack ground truth background mutation frequencies for every genomic position, we can assess a given model’s specificity via orthogonal criteria for whether mutations deemed significant are indeed under positive selection.

One orthogonal criterion we can use to assess whether a mutation is under positive selection is the distribution of variant protein-

coding effects compared to expectation. Variant effects of mutations under no selective pressure will be randomly distributed according to the codon structure and signatures of mutational processes operating throughout the exome. In contrast, positively selected mutations are mostly nonsynonymous or splice altering, since essentially all coding driver mutations alter their corresponding protein. Therefore, an effective proxy for the specificity of a given algorithm is the degree to which the candidate driver hotspots it finds are enriched for nonsynonymous mutations beyond the expected baseline.

We calculate this baseline by using the overall exonic substitution frequencies for each trinucleotide context to generate the expected background frequencies of each coding effect — synonymous, missense, nonsense — in that context (STAR Methods). For example, we expect background C→T mutations within the sequence context TCG to be 27% synonymous, 69% missense, and 4% nonsense (see **Figure S1** for the full distribution). By adding the contributions from all 96 trinucleotide contexts, weighted by their relative frequencies, we find an overall expected baseline distribution of 28% synonymous, 67% missense, and 5% nonsense mutations. Note that throughout our entire analysis, we avoid splice-altering mutations by excluding genomic positions and mutations within 5 basepairs of a splice site, since synonymous events at those positions frequently disrupt splicing (Supek et al., 2014).

### 2.2. Novel hotspots found significant by conventional algorithms are mostly neutral

A simple and, to date, common background model employs the conventional assumption used in many studies up until recently (Van den Eynden et al., 2015; Lohr et al., 2012; Lawrence et al., 2014; Chang et al., 2016; Baeissa et al., 2017; Araya et al., 2016; Miller et al., 2015) that all sites within the same *k*-mer context in a given gene are equally mutable. Our version of this model, which we will refer to as “Uniform-within-gene,” assumes that the background mutation frequency at a given position is proportional to the average exome-wide mutation frequency for the base substitution/trinucleotide combination at that position, weighted by a gene-specific mutability factor that captures the overall number of mutations in the gene (STAR Methods). Expected counts are Poisson-distributed around this background frequency. Applying these assumptions yields a long list of 1,677 significant hotspots within 1,218 genes across our pan-cancer cohort. Although many of these significant hotspots occur in known cancer genes (KCGs) as defined by the Cancer Gene Census (CGC) (v85) (Futreal et al., 2004) (STAR Methods) — 92/218 KCGs contain significant hotspots (**Figure 1a**) and recapitulate known driver events (e.g., BRAF V600E) — 1,250 significant hotspots occur in 1,116 genes with uncertain oncogenic roles (non-KCGs) (**Figure 1a**). All of these hotspots have 3 or more patients with the exact same base-pair substitution.

Significant hotspots in KCGs are nearly devoid of synonymous mutations (0.4% of mutations at hotspots vs. the expected 27.9%), providing strong orthogonal evidence that these mutations are indeed under positive selection. If the 1,250 putative driver hotspots in non-KCGs were also drivers, one would expect that they too would be highly depleted of synonymous mutations (STAR Methods). Instead, however, we find that the distribution of their coding

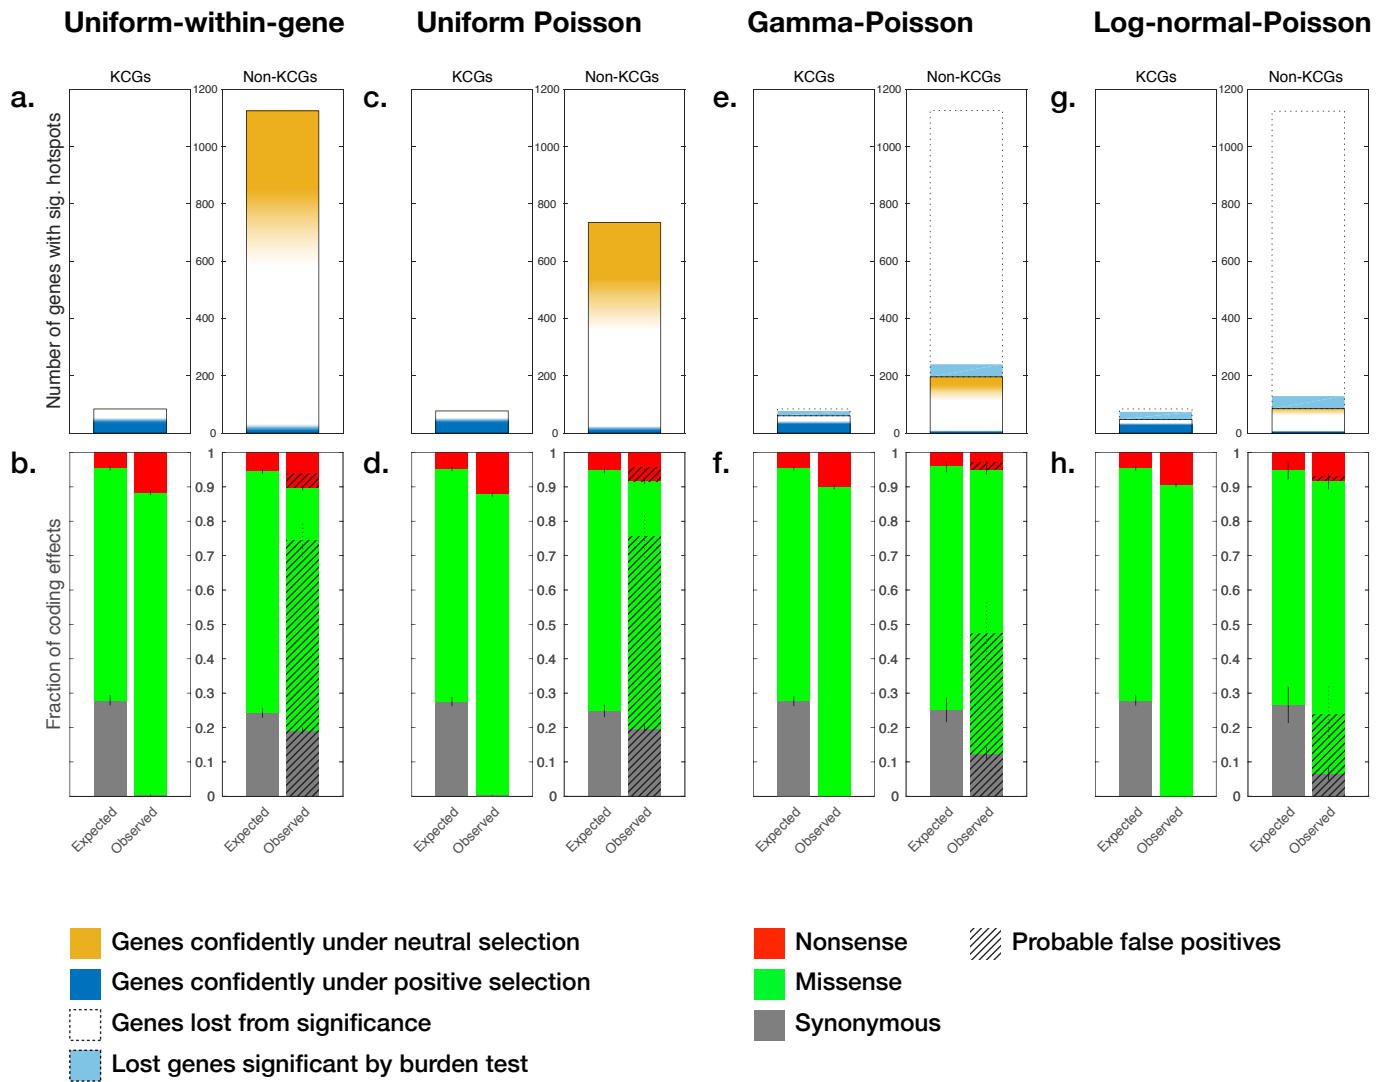

**Figure 1:** Comparison of number of genes containing hotspots and protein-coding effects of hotspots found significant by the four statistical models. **a., c., e., g.** Number of genes containing significant hotspots ( $q \leq 0.1$ ) according to each of the four statistical models, segregated by whether the gene is a Known Cancer Gene (KCG) (i.e., in the Cancer Gene Census). Genes under neutral selection are conservatively defined to have  $\geq 80\%$  probability of their  $dN/dS$  falling between 0.8 and 1.1; orange scale fades to white when this probability falls below 0.5. Genes under positive selection are defined to have  $\geq 97.5\%$  probability  $dN/dS > 1.2$ ; blue scale fades to white when probability falls below 0.7. Genes are denoted as lost from significance relative to the Uniform-within-gene method. **b., d., f., h.** Expected and observed distributions of protein coding effects of hotspot mutations significant by each model ( $q \leq 0.1$ ), segregated by Known Cancer Gene status. We estimate the overall fraction of false positive passenger mutations (hatched bars) by assuming all significant synonymous hotspots are false positives. Thus, the proportion of observed nonsynonymous mutations concordant with the expected ratio between synonymous and nonsynonymous mutations will also be passengers. Lines between stacked bars denote 95% confidence intervals.

effects is very close to what we expect by chance (observed silent: 19.1% vs. expected 24.3%, **Figure 1b**), indicating that the majority of these hotspots are under little-to-no selective pressure and are therefore most likely neutral passenger events, as elaborated below.

If we conservatively assume that mutational patterns in KCGs reflect mutational patterns of driver genes in general, then the overwhelming majority of all silent hotspots are likely to be passenger events, given their extreme paucity in KCGs. We would therefore expect a proportion of observed nonsynonymous mutations concordant with the expected ratio between synonymous and nonsynonymous mutations to also be passenger events. For example, if the expected ratio of synonymous to nonsynonymous mutations were 1:3, and 10% of putative significant hotspots were synonymous, then we would expect an additional 30% of the putative nonsynonymous hotspots to also be passengers. By this reasoning, at least 78.8% of putative nonsilent driver hotspots in non-KCGs according to the conventional Uniform-within-gene model are also false positives.

In addition to finding that these hotspot mutations at the base-pair level are neutral, we also noted that a large fraction of the genes containing these hotspots are themselves neutral (i.e., they show the expected ratio of nonsynonymous:synonymous mutations). To determine this, we assessed whether a gene was under neutral selection via the molecular evolution criterion of the ratio of a gene's nonsynonymous:synonymous somatic mutation densities ( $dN/dS$ ) (Kimura, 1977; Martincorena et al., 2017; Nei and Gojobori, 1986). After normalizing for signature heterogeneity and genes' codon structures (Greenman et al., 2006) (STAR Methods), we expect parity between these densities (i.e.,  $dN/dS \approx 1$ ) in genes under neutral selection. Computing  $dN/dS$  for each gene can only yield a confident estimate in genes with sufficient numbers of mutations (i.e., genes with a relatively high background mutation frequency), allowing us to conservatively assess whether they were under neutral selection. We identified 404 (of the  $\sim 20,000$ ) genes confidently under neutral selection ( $\geq 80\%$  probability that the gene's  $dN/dS$  is between 0.8 and 1.1). 23.8% of non-KCGs that contained significant hotspots were either within these 404 genes ( $n = 101$ ) or only contained silent hotspots ( $n = 165$ ) (**Figure 1a**; **Table S1**), further confirming the poor specificity of the conventional Uniform-within-gene model. Overall, we conclude that analysis methods based on the conventional assumption, that equivalent base-pairs (i.e., same  $k$ -mer context/gene) have the same background mutability, produce lists of candidate hotspots with many false positives.

Thus, the apparent significant recurrence of mutations even at sites/genes under neutral selection is due to an incorrect background model that fails to account for the underlying heterogeneity in the background base-wise mutability. Some sites may simply be more intrinsically mutable than others, rendering them unusually prone to recurrent mutations even in the absence of selective pressure, thus giving rise to passenger hotspots. We therefore need to model mutational recurrences with a site-specific background model.

### 2.3. Currently known covariates cannot account for all base-wise mutational heterogeneity

It is possible that the unaccounted variability might be completely explained by previously reported covariates that affect mutation frequencies on both coarse and fine scales. Covariates such as replication timing (Stamatoyannopoulos et al., 2009), chromatin state (Polak et al., 2015), and gene expression levels (Pleasant et al., 2010) have been reported to influence background mutability on a broad scale ( $\sim 100$  kbp–1 Mbp). More recent studies have discovered that other covariates like nucleosome positions or transcription factor binding activity influence mutability on a much smaller scale (10s of basepairs) (Poulos et al., 2016; Sabarinathan et al., 2016; Mao et al., 2018). We tested a fixed regression model in which the base-wise mutation frequency is entirely determined by these covariates (STAR Methods), which we refer to as the “Uniform Poisson” model. However, we find that the covariates alone are incapable of explaining all of the variability of base-wise mutability, as the distribution of protein-coding effects of hotspots in non-KCGs found to be significant by this method is essentially identical to that of the Uniform-within-gene model (observed silent fraction of 19.8% vs. expected 24.8%; **Figure 1d**). Moreover, 26.1% ( $n(dN/dS \approx 1) = 71$ ,  $n(\text{only silent hotspots}) = 120$ ) of the 732 non-KCGs containing significant hotspots are confidently under neutral selection (**Figure 1c**). Although additional yet-undiscovered covariates may be able to better explain this variability in the future, we currently are forced to update the model to explicitly allow for variability in base-wise mutation frequencies beyond what can be fully modelled with currently known covariates.

### 2.4. Introducing uncertainty in site-specific mutability improves specificity of finding driver hotspots with minimal loss of sensitivity

In contrast to the Uniform Poisson model, where a site's mutation frequency is a constant determined unambiguously by its covariates, another way to account for the base-wise variability is by allowing the mutation frequency at each site to be drawn from a probability distribution reflecting the uncertainty in the background mutability of equivalent base-pairs (e.g., same  $k$ -mer context or mutational process). The choice and parameterization of the underlying distribution can make a large difference in model performance. Recent methods have employed a gamma-Poisson model, both at the gene level (Weghorn and Sunyaev, 2017; Martincorena et al., 2017; Imielinski et al., 2017) and on the base-level (Smith et al., 2016), in which mutation counts are still Poisson-distributed, but the Poisson rates vary according to a fitted gamma distribution, adding an additional parameter to represent the overdispersion. There is no inherent biological rationale for using the gamma distribution to represent the uncertainty of the Poisson rates — it is merely mathematically convenient, as there is an easy closed-form expression for a Poisson distribution whose rate is gamma-distributed: the negative binomial (also known as the gamma-Poisson) distribution. We found that applying the Gamma-Poisson regression model (STAR Methods) indeed explained a large amount of the additional variability, but it still did not capture all of it; while the set of significant hotspots in non-KCGs is depleted in synonymous events (observed 12.3% vs. expected 25.1%, **Figure 1f**), we still

see that 19% (36/194) of non-KCGs containing significant hotspots are neutral (**Figure 1g**), suggesting that all the variability is not yet accounted for in this model and there is additional specificity to be gained.

Next, we tried to improve on the Gamma-Poisson model by replacing the gamma distribution with a log-normal distribution (STAR Methods). Unlike the gamma distribution, arbitrarily chosen for its mathematical convenience of its conjugacy to the Poisson distribution, the log-normal distribution is based on the idea that mutant base-pairs do not instantaneously arise but are the net result of many independent consecutive events (e.g., damage and repair processes), each with an independent probability of occurring. For instance, a mutagen has a certain probability of initially damaging a nucleotide, which in turn has a certain probability of being missed by all repair mechanisms before S-phase. Should all of these events occur, the DNA polymerase must also, with a certain probability, fail to recognize the lesion and incorporate the wrong complementary base; if this mutated base survives another cell cycle without being recognized, it becomes a mutated base-pair in the genome. By the geometric central limit theorem, this product of probabilities approaches a log-normal distribution (Sutton, 1997).

Applying this log-normal-Poisson (LNP) model to our cohort identified a list of candidate driver hotspots in non-KCGs that was the most depleted in synonymous events relative to expectation (observed 6.6% vs. expected 26.5%, **Figure 1h**), and the fraction of non-KCGs under neutral selection with significant hotspots was also the lowest compared to the other 3 models (8.4% (7/83) of genes; **Figure 1g**). These results suggest that the LNP model has the highest specificity among the 4 tested models.

Although this new statistical model increases specificity of finding true oncogenic hotspots, this potential advantage may come at the expense of decreased sensitivity. Indeed, 33 KCGs containing significant hotspots according to the Uniform Poisson model are lost from significance by the LNP model; 18 KCGs are lost from significance by the Gamma-Poisson model (**Figure 1e** and **Figure 1g**). Although both the Gamma-Poisson and LNP models find fewer KCGs containing hotspots than both conventional models, not all cancer genes driven by point mutations must have strong mutational hotspots. For example, many tumor suppressors can be inactivated via truncating mutations anywhere in their ORF; thus, while the gene as a whole is recurrently mutated, its mutations do not need to recur at the same specific genomic position to incur the same functional impact. A position with many truncating mutations would not have any additional fitness advantage over any other position with fewer truncating mutations, since any truncating mutations far enough upstream from the C terminus will either induce nonsense-mediated degradation of the mRNA or produce a non-functional partial protein product. Thus, recurrent mutations in cancer genes not driven by hotspots should not be considered false negatives for an algorithm that solely evaluates mutations at the single-site level.

Although such genes may not be driven by hotspots, they will still display an overall excess of nonsilent mutations and should therefore be significant by a gene-level burden test that assesses whether the gene as a whole has an excess of nonsilent mutations. Out of the 33 genes lost from significance under the LNP model, 26 are still significant by a conservative burden test

( $\text{Prob}[dN/dS \geq 1.2] \geq 0.975$ ). The additional 7 genes have too few mutations to confidently establish an excess of nonsilent events by our conservative criterion but are all deemed significant by more sophisticated methods (e.g., MutSigCV (Lawrence et al., 2013), which incorporates genomic covariates to estimate gene-level background mutation frequencies). Similarly, the 18 genes lost by the Gamma-Poisson model are also detected by gene burden tests. Thus, both the LNP and Gamma-Poisson models retain sensitivity if we specifically differentiate cancer genes driven by hotspots from genes driven by an overall excess of mutations.

## 2.5. Comparative analyses confirm improved performance of the LNP model

To more rigorously assess the sensitivity and specificity trade-offs of the different methods, we used Receiver Operating Characteristic (ROC) curve analysis employing as ground truth sets: (i) a false-positive set of 404 genes confidently under neutral selection, as defined before ( $\text{Prob}[0.8 \leq dN/dS \leq 1.1] \geq 80\%$ ); and (ii) a true-positive set of 44 genes, defined as KCGs with a high concentration of nonsilent mutations at recurrently mutated positions (as opposed to an excess of nonsilent mutations distributed across the ORF). We identified these 44 true positive genes by requiring that the  $dN/dS$  of the genes dropped by more than 5% when we removed all sites near significance ( $q \leq 0.25$ ) by the least conservative Uniform-within-gene model (**Table S1**). We then plotted ROC curves based on these conservative ground truth sets for the four methods, using each method's minimum  $q$ -value across all sites in the gene as the discrimination threshold (**Figure 2a**, **Figure S2a**). We observed that the LNP model had the highest area under the curve (AUC), followed by the Gamma-Poisson, Uniform Poisson, and Uniform-within-gene methods. On each curve, we denote the positions on the ROC curves corresponding to the standard significance threshold of  $q \leq 0.1$ . At  $q \leq 0.1$ , the LNP model identified 494 significant hotspots in 134 genes. Out of these 134 genes, 40 belong to either the positive (39 genes containing 169 hotspots) or negative (1 gene/1 hotspot) truth sets. The 1 false positive gene out of the 40 yields a 3% FDR, corresponding to a sensitivity of 89% ( $\text{CI}_{95\%}[75\%, 95\%]$ ) with a false positive rate (FPR) of 0.25% ( $\text{CI}_{95\%}[0.006\%, 0.91\%]$ ). At the same threshold, the Gamma-Poisson model achieved an insignificantly higher sensitivity of 95% ( $\text{CI}_{95\%}[85\%, 99\%]$ ) but a 12-fold higher FPR of 3.5% ( $\text{CI}_{95\%}[1.91\%, 5.44\%]$ ), corresponding to an FDR of  $\sim 25\%$  (14 false positive genes out of 56). The specificity losses for the conventional models are even higher, with FPRs exceeding 15% and FDRs exceeding 60%. This ROC analysis suggests that the LNP model performs the best among the 4 models, having the highest specificity without a significant loss in sensitivity.

Another way to quantify the inflation of significant results of different methods is to examine their quantile-quantile (QQ) plots. Since we expect that most sites in the genome do not harbor driver events, we expect their  $p$ -values to be uniformly distributed. Indeed, when comparing the QQ plots of the four different methods, we observe that the QQ plots of the conventional methods are inflated, demonstrating deviation from the uniform distribution towards more significant  $p$ -values in a large fraction of genomic loci (**Figure S2b**). The inflation of the models also affects the resulting  $q$ -values and produces lists of significant hotspots (and

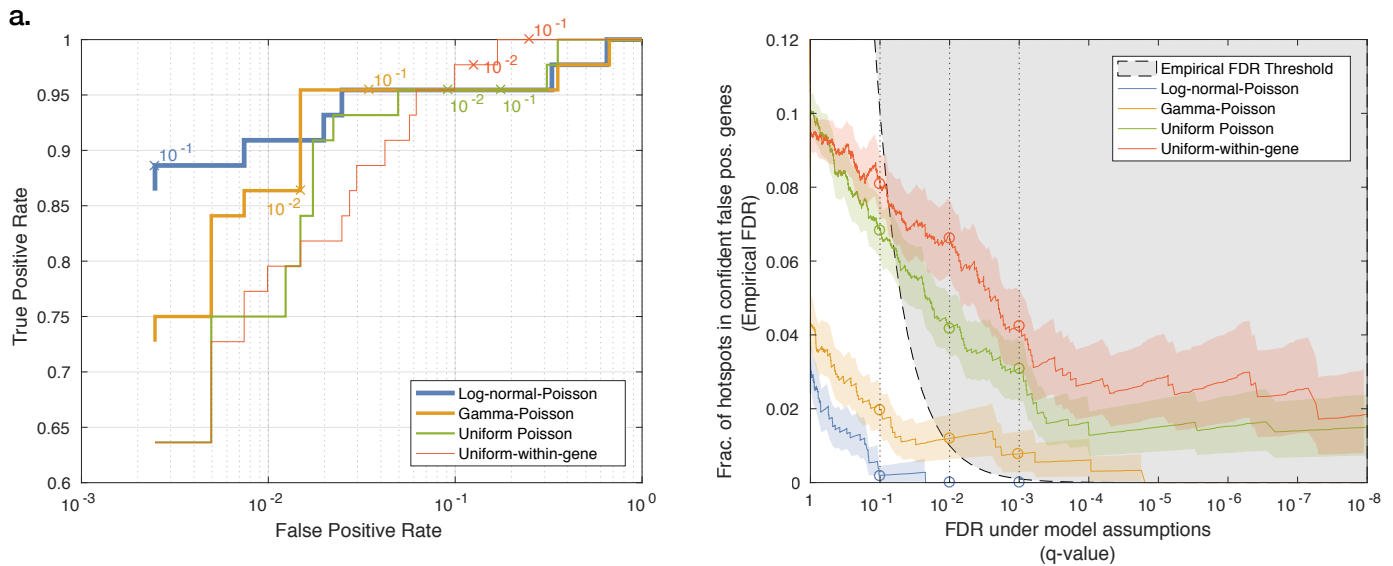

**Figure 2:** Performance of the four methods quantified by ROC and FDR analysis. **a.** Receiver Operating Characteristic (ROC) curves for each method evaluated at the gene level. Truth set used for estimating false positive rate comprises genes confidently under neutral selection; truth set used for estimating true positive rate comprises known cancer genes with a high proportion of mutations at recurrently mutated positions. A gene is considered a hit for the ROC analysis if it has at least one hotspot more significant than a specific  $q$ -value cutoff.  $Q$ -value cutoffs of 0.1 and 0.01 are marked on each curve. **b.** Fraction of loci falling in false positive truth set genes (empirical FDR) as a function of  $q$ -value. Gray area indicates region for which the empirical FDR exceeds the  $q$ -value; methods whose curves lie in this region yield more false positives than expected by the  $q$ -value cutoff. Colored regions indicate 95% beta distribution confidence intervals on fractions.  $q$ -value thresholds of 0.1, 0.01, and 0.001 are shown as vertical dotted lines, with circles denoting where they intersect the curves.

genes) that may contain more false positives than expected by the  $q$ -value cutoff. In the case of a well-calibrated model (and hence a well-behaved QQ plot), setting a specific  $q$ -value threshold (e.g.,  $q \leq 0.1$ ) would result in a list of significant hits that contain (on average) at most the desired fraction (10%) of false positives. It is therefore important to test whether this is indeed the case.

We used our set of false positives to measure the empirical false discovery rate. Since this is a conservative list, we expect to have an even lower FDR than the chosen  $q$ -value cutoff. We compare the empirical FDR as a function of  $q$ -value among the 4 models (**Figure 2b**). The LNP model is the only model for which the empirical FDR did not exceed the desired FDR (**Table 1**). By contrast, even at the extreme  $q$ -value threshold of  $10^{-8}$ , approximately 5% of hotspots significant by the Uniform-within-gene or Uniform Poisson models are in false-positive genes. Thus, these data confirm that the LNP model has the highest specificity of the four tested models and is the only model in which the  $q$ -value cutoff properly bounds the false discovery rate.

## 2.6. The LNP model produced the most accurate estimates of neutral mutation frequency

In addition to evaluating model performance by examining the protein-coding effects of hotspots found significant by each model, we can also assess how well each model predicts the expected number of mutated patients at each genomic position. A well-calibrated model accurately infers the background mutation frequency at each position, so the expected mutation frequencies at positions under neutral selection (and thus mutated solely due to background processes) will be concordant with the observed frequencies. On the other hand, a poorly-calibrated model that inac-

curately models the background frequency will predict mutational frequencies that significantly deviate from the observed frequencies.

To compare the accuracy of the different background models, we calculated the observed distribution of recurrent synonymously mutated sites (i.e., the fraction of sites with a specific number of mutations out of all sites that can harbor synonymous mutations) (**Figure 3a**). We then compared to the expected distributions predicted by each of the four models. While the conventional models underestimate the fraction of sites mutated in 3 or more patients — synonymous sites mutated in exactly 3 patients are  $3.5\times$  more likely than expected by the Uniform-within-gene model; overall, synonymous mutations recurring in  $\geq 3$  patients are  $12\times$  more likely than expected by the model — both overdispersed models (Gamma-Poisson and LNP) are more accurate, with the LNP model most correctly recapitulating the observed distribution even for highly recurrent events, with synonymous mutations recurring in  $\geq 3$  patients  $1.84\times$  more likely than expected by the Gamma-Poisson model, but only  $1.05\times$  more likely by the LNP model.

Although the two overdispersed models performed much better in predicting mutation frequencies than the non-overdispersed models, they are not identical. We illustrate a specific instance of this by looking at a sequence context containing recurrent mutations in likely passenger genes that only the LNP model avoids calling significant (**Figure 3b**). Three of the most recurrently mutated positions in the sequence context A(A $\rightarrow$ C)G occur in Spectrin alpha (*SPTA1*; 10 missense mutations: 6 in stomach adenocarcinoma and one each in bladder, cervical, colon, and lung squamous), Titin (*TTN*; 7 missense mutations: 3 in stomach; 2 in colorectal; 1 each in lung squamous and esophageal), and regulat-

| Method              | $q \leq 0.1$    | $q \leq 0.01$  | $q \leq 0.001$ |
|---------------------|-----------------|----------------|----------------|
| Uniform-within-gene | 0.08 (136/1678) | 0.07 (61/920)  | 0.04 (25/590)  |
| Uniform Poisson     | 0.07 (106/1547) | 0.04 (42/1006) | 0.03 (22/713)  |
| Gamma-Poisson       | 0.02 (14/710)   | 0.01 (6/504)   | 0.01 (3/387)   |
| Log-normal-Poisson  | 0.002 (1/511)   | 0.0 (0/290)    | 0.0 (0/191)    |

**Table 1:** Fraction of hotspots in confident false positive genes (empirical FDR) at the indicated q-value cutoff. Number of hotspots in false positive genes and total number of significant hotspots at each q-value cutoff are indicated in parentheses.

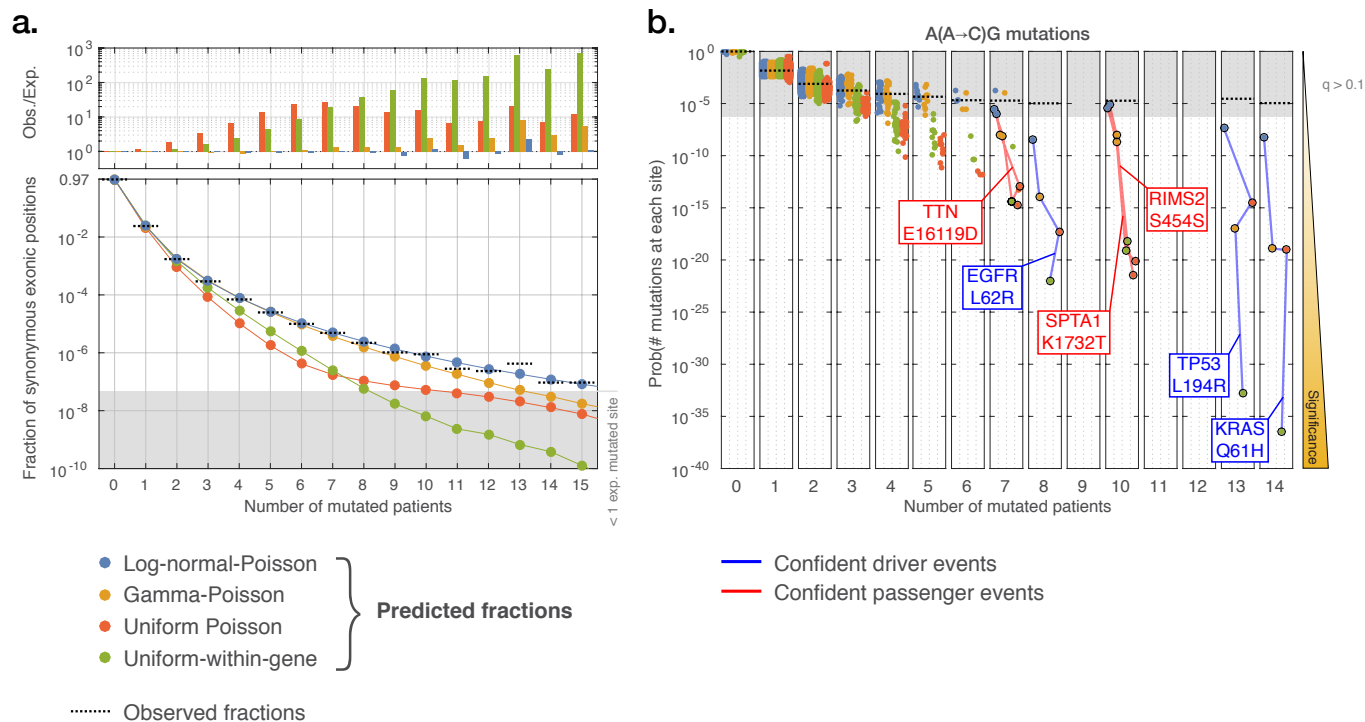

**Figure 3:** Predicted frequencies of recurrent mutations according to the four methods. **a.** Fraction of synonymous hotspot mutations observed in multiple patients (0 to 15; total cohort size 9,023). Colored lines represent the expected fraction of sites as predicted by each of the four models; dashed black lines represent the observed fractions. Ratio of observed:expected fractions for each model are plotted above each recurrence level. Log-normal-Poisson model best matches the observed fractions. Grey region indicates fraction corresponding to  $<1$  base-pair of synonymous exonic territory (21.4 million possible base-pair substitutions that could yield a synonymous codon change). **b.** Probabilities of observing every mutation in sequence context A(A→C)G as predicted by the four models; each dot corresponds to an observed mutation. Lines connect the different models' predictions for the same mutation; blue lines highlight confident driver mutations, while red lines highlight confident passenger mutations. Grey region indicates model predictions with  $q$ -value  $>0.1$  (i.e., non-significant recurrence), indicating that while driver hotspot mutations are significant by all models, only the log-normal-Poisson model correctly infers passenger hotspot mutations as non-significant.

ing synaptic exocytosis protein 2 (*RIMS2*; 10 synonymous mutations; 5 in stomach, 3 in colon, 1 each in esophageal and liver). All three of these mutations are found to be significant by the Gamma-Poisson model ( $q = 5 \times 10^{-4}$ ,  $q = 0.002$ ,  $q = 0.002$ , respectively) and by both conventional models ( $q$ -values  $< 10^{-13}$  for all genes and models) but not by the LNP model ( $q = 0.97$ ,  $q = 0.72$ , and  $q = 1.0$ ). As all of these genes are only expressed in specific tissue types (*SPTA1* in red blood cell progenitors, *TTN* in muscle cells, and *RIMS2* in neurons), it is highly likely that these represent passenger hotspots. Additional evidence that these genes are passengers is provided by the  $dN/dS$  analysis, which assigns the genes tight confidence intervals around 1 (*SPTA1*: mean  $dN/dS$  1.05,  $CI_{95\%}[0.92, 1.19]$ ; *TTN*: mean 0.98,  $CI_{95\%}[0.94, 1.02]$ ; *RIMS2* mean 1.02,  $CI_{95\%}[0.86, 1.22]$ ), and by the fact that the hotspot in *RIMS2* is synonymous. By contrast, three of the other most recurrently mutated positions in the context fall in known drivers (*EGFR*,

*TP53*, and *KRAS*, mutated in 8, 13, and 14 patients, respectively), and are significant by all four methods. Thus, taken together, these data suggest that the overdispersed LNP model most accurately predicts actual mutation frequencies and makes the fewest false-positive calls.

### 2.7. LNP model analysis reveals significant hotspots in potential novel oncogenes

The main scientific interest of any significance analysis method is to discover promising novel driver candidates in the resulting significant gene list. Since the LNP model performed well in excluding many more false-positive passenger mutations than the other 3 tested models, we can have more confidence that the genes in the resulting list of still-significant novel hotspots are true drivers. The LNP model yielded 494 significant hotspots ( $q \leq 0.1$ ) in 134 genes (49 KCGs, containing 405 hotspots, and 85 non-KCGs, containing

89 hotspots) (**Table S2**). The KCGs contain 29 of the conservative true positive genes (including *KRAS*, *BRAF*, and *PIK3CA*) and also 20 other genes not in the truth set but still with significant hotspots, including *PTEN*, *SMAD4*, and *CDKN2A*.

Since we use an FDR threshold of  $q \leq 0.1$ , approximately 49 out of the 494 significant hotspots should be false positives. If we assume that none of the 405 hotspots in KCGs are false positives, then we expect that 40 (= 89 - 49) out of the 89 hotspots in 85 non-KCGs are true positives.

Within the 85 non-KCGs, 26 have been previously experimentally implicated in cancer but are not yet well-known enough to be included in the CGC, or are in the CGC but not due to somatic point mutations (e.g., implicated by germline risk alleles or copy-number/structural alterations). Below, we discuss four of these genes, with evidence on other genes noted in **Table S3**.

One such gene is *MYC*, which is well-known as one of the most recurrently amplified oncogenes in many cancer types ([Beroukhi et al., 2010](#)). We find an S146L mutation in 8 patients (3 head-and-neck, 2 colon, and 1 each for cervical, lung adeno, and melanoma). Nearby amino acid residue K143 is an acetylation site ([Zhang et al., 2005](#)), and c-Myc acetylation suppresses its ubiquitination, preventing degradation ([Patel et al., 2004](#)). The S146L substitution may affect ubiquitination at K143, preventing c-Myc degradation, as suggested by phosphorylation at a different site in lymphoma ([Bahram et al., 2000](#)). Indeed, *MYC* S146L is mostly copy neutral relative to amplified wildtype *MYC* in tumors from the same tissues (absolute copy number ranksum  $p$ -value = 0.02, **Figure S3d**).

Another such gene is *ERCC2*, which encodes a DNA helicase essential for nucleotide excision repair (NER) ([Fuss and Tainer, 2011](#)). We identify an N238S mutation recurrent in 9 bladder patients. Germline SNPs in *ERCC2* are associated with xeroderma pigmentosum, which greatly elevates cancer risk ([Lehmann et al., 2014](#)). However, *ERCC2*'s status as a somatic driver had not been characterized until recently ([Kim et al., 2016](#)). Mutations across the helicase binding domain (including N238S) were reported to strongly correlate with activity of a distinct mutational process (COSMIC Signature 5), providing strong evidence that Signature 5 mutations are the result of unrepaired DNA damage due to *ERCC2* loss-of-function ([Kim et al., 2016](#)). While the selective advantage of *ERCC2* loss in particular is unknown, loss of certain repair mechanisms has been shown to allow cells to evade DNA damage-induced apoptotic responses or checkpoints that would slow cell proliferation ([Calvo et al., 2013](#)).

Two non-KCGs belong to members of the Ras superfamily, *RRAS2* and *RHOB*. *RRAS2* shares the majority of its amino acid sequence with canonical Ras subfamily oncogenes *HRAS*, *KRAS*, and *NRAS* (**Figure S3a**). The Q72L mutation observed in 11 patients spans a wide variety of tumor types (head-and-neck, lung adeno/squamous, prostate, testicular, and endometrial) and is paralogous to the well-known Q61 hotspot in *H/K/NRAS*, which abrogates GTP hydrolysis, leaving the protein constitutively active ([Marcus and Mattos, 2015](#)). The same constitutive activation in *RRAS2* has been experimentally confirmed both in mechanism and oncogenic potency ([Graham et al., 1994](#)), suggesting that *RRAS2* oncogenic activity is analogous to that of the canonical Ras subfamily members.

*RHOB*, a member of the Rho GTPase subfamily, has two

hotspots near significance: E172K ( $q = 0.12$ , mutated in 7 bladder cancers), and P75[ST] (mutated in 3 bladder cancers). Mutations of E172 have been shown to be destabilizing, significantly reducing protein half-life ([Hurst et al., 2017](#)). E172 lies in the PKN-binding domain ([Maesaki et al., 1999](#)), which is conserved across Rho GTPases *RHOA/B/C* (**Figure S3b**). *RHOB*'s binding and activation of PKN specifically induces degradation of growth factor receptor EGFR ([Gampel et al., 1999](#)). Together, these lines of evidence suggest that mutant *RHOB* may contribute to oncogenesis by allowing excess EGFR to accumulate, thereby promoting growth. *EGFR* is known to be focally amplified in bladder cancer. The effects of P75 mutation is less clear — it occurs towards the end of the switch II domain, which binds to GEFs to facilitate guanine nucleotide exchange ([Reijnders et al., 2017](#)). This domain is both highly conserved and has a high burden of mutations across the 4 Rho GTPase members (**Figure S3b**). The same residue is mutated in *RAC1* and *RHOA*.

Next, we turn our attention towards the 59 remaining genes that have not yet been experimentally implicated in cancer. Following the same logic as above, if we conservatively assume that none of the 26 genes that were implicated in cancer due to other alterations are false positives, then we would only expect 10 (= 59 - 49) out of these 59 to be true cancer genes. Although many of these genes are poorly studied, we briefly discuss four genes of interest below.

*SLC27A5* ligates acyl-CoA to very long chain fatty acids, which is required for their subsequent metabolism. Mutation T554I recurs in 13 melanoma patients, arising via two distinct point mutations: a single C→T nucleotide substitution inducing codon change ACC→ATC (3 patients), and a dinucleotide CC→TT substitution inducing codon change ACC→ATT (10 patients). The presence of two distinct genomic events causing the same amino acid change is strong evidence that the amino acid substitution is under positive selection. T554 occurs within a highly conserved motif (GDTFR-WKGENV) across the solute carrier 27 family (**Figure S3c**) and in many orthologs. This motif is suspected to comprise an acyl-CoA synthetase domain ([Pei et al., 2004](#)), important to the function of the protein; the exact function of these mutations, however, is unknown.

Another gene involved in lipid metabolism is *SPTLC3*, which is mutated in 12 melanomas and one endometrial cancer. *SPTLC3* is highly expressed in skin tissue at an order of magnitude higher than most other tissue types ([GTEx Consortium et al., 2017](#)), suggesting a functional role.

*EEF1A1* is a subunit of the elongation factor-1 complex that affects cell proliferation by various mechanisms, including mRNA translation downstream of TGFβ-receptors ([Lin et al., 2010](#)), affecting epithelial-mesenchymal transition as part of the BAT complex ([Hussey et al., 2011](#)). The hotspot in T432I is located in a phosphorylation site ([Eckhardt et al., 2007](#)) and appears in 4 liver tumors, 1 head-and-neck, and 1 GBM tumor.

*UPF2* targets transcripts with premature stop codons for nonsense-mediated decay ([Lykke-Andersen et al., 2000](#)), and its E1033D mutation occurs 8 times (3 endometrial, 3 stomach, and 2 colon cancers). Nonsense-mediated decay has a major effect on tumors with microsatellite instability (MSI) since many transcripts can have frameshift insertions or deletions (indels). Indeed, the 8 mutated tumors are enriched with indels (ranksum



$p$ -value =  $2.3 \times 10^{-7}$ ; **Figure S3e**) relative to other patients in the same tumor types as the mutants. Therefore, altering nonsense-mediated decay in these tumors suggests a potential functional role for these mutations.

Overall, we demonstrate that the LNP model produces a highly accurate list of driver hotspots that provide clear biological hypotheses, some of which have already been supported by experimental data. Future experiments will be needed to validate the functional role of the other hotspots.

### 2.8. Hotspot-generating mutational processes have similar base-wise heterogeneity despite having vastly different mutation frequencies

Our results provide evidence of pervasive variability in base-wise mutation frequency across cancer, irrespective of mutagen or underlying mutational process. Next, we tested whether different mutational processes have different levels of variability. Each mutational process has specificity for particular genomic contexts and features, defining a set of “bases-at-risk” for that process. We might expect differences in the degree to which different mutational processes diverge from uniformly targeting their bases-at-risk and thus different levels of variability. Because there is considerable heterogeneity in the overall mutation frequencies of different processes (ranging from  $\sim 10$  muts/million bases-at-risk for CpG deamination to  $>5,000$  muts/million bases-at-risk for POLE hypermutation), we might predict a correspondingly wide range in the variability across bases-at-risk of different processes. Tellingly, many published analyses have been forced to exclude hypermutated tumors from significance analyses because they yield too many significantly mutated genes/hotspots, largely due to the inaccurate background models in wide use (Bailey et al., 2018; Martincorena et al., 2017). One might surmise from this that high-mutation-frequency processes are more prone to generating hotspots, reflecting greater variability in their base-wise mutation frequencies.

The LNP framework provides a natural way of quantifying both the mutation frequency and variability of different mutational processes. We fit the model to all bases-at-risk for each process; the log-normal parameters  $e^\mu$  and  $e^\sigma$  are equal to the geometric mean and geometric standard deviation, respectively, of the base-wise mutation frequency. The geometric mean is simply equivalent to the median mutation frequency across all bases-at-risk. The geometric standard deviation  $e^\sigma$  is a dimensionless scale factor indicating the average multiplicative distance from the mean; for example,  $e^\sigma = 2$  signifies that at 1 standard deviation above the mean, bases will be twice as mutable as the average, while at 1 standard deviation below the mean, bases will be half as mutable as the average. At its minimum value  $e^\sigma = 1$ , there is no variability in the base-wise mutation frequency. Hence, the same value of  $e^\sigma$  indicates an equivalent amount of base-wise variability, irrespective of mutation frequency. Our fully Bayesian model finds not only the optimal values of  $e^\mu$  and  $e^\sigma$  but also the posterior distribution on the parameters, allowing us to quantify the uncertainty on their values. In general, mutational processes that generate few mutations will have high model uncertainty, while processes that generate many mutations will have lower uncertainty. The values and uncertainties of  $e^\sigma$  of two processes can be used to test whether they indeed have different levels of variability.

We selected the following 8 mutational processes to examine by the LNP model because they are mostly of known etiologies and very specific to certain patients and sequence contexts, making assignments of patients to these signatures unambiguous: APOBEC (3A+3B, COSMIC Signatures 2 and 13), aging (spontaneous CpG deamination, COSMIC Sig. 1), esophageal (Dulak et al., 2013) (COSMIC Sig. 17), MSI (COSMIC Sig. 6), POLE (COSMIC Sig. 10), POLE+MSI (Haradhvala et al., 2018) (COSMIC Sig. 14), smoking (COSMIC Sig. 4), and UV (UV-A only, COSMIC Sig. 7). We used SignatureAnalyzer (Kim et al., 2016), which is based on a Bayesian implementation of non-negative matrix factorization (NMF), to infer the probabilities of each mutation being assigned to each process. We then identified 8 subcohorts of patients (each comprising between 44 and 4,739 patients) in which each of these processes dominated ( $\geq 75\%$  assignment probability) at their relevant sequence contexts (e.g., C→T mutations at CpG sites for aging; T(C→A)T, T(C→T)G, and A(A→C)A contexts for POLE cohort; and C→T mutations at pyrimidine dimers for UV). The mutational spectra of these subcohorts is shown in **Figure S4**. For each of these “process-centric” subcohorts, we fit the LNP model to the relevant contexts.

We plotted the posterior distributions of  $e^\mu$  and  $e^\sigma$  for each pentamer context belonging to the 8 mutational processes to test whether processes with higher mutation frequencies also have higher base-wise variability. To our surprise, our results show that despite extreme heterogeneity in overall mutation frequency (spanning 5 orders of magnitude, from  $\sim 0.1$  mutation/million positions for esophageal to  $>5,000$  mutations/million positions for POLE), most mutational processes show a similar amount of nonzero base-wise variability (**Figure 4a**), with  $e^\sigma$  roughly between 2 and 3.

Notably, the only exception was the esophageal mutational process, which showed the highest variability despite having one of the lowest mutation frequencies. This may indicate that additional yet-undiscovered factors may correspond to elevated mutability at specific bases-at-risk for this process. It was recently reported that the esophageal signature disproportionately mutates positions within CTCF binding sites (Katainen et al., 2015), possibly due to bound CTCF transcription factors occluding damaged bases from repair processes.

To test whether variability was independent of mutation rate even within individual processes, we partitioned the high mutation frequency processes between hypermutated samples (top decile of mutation frequency) and non-hypermutants, and compared their  $e^\sigma$  values. We observed similar levels of base-wise variability between the two partitions (**Figure S5**), indicating that there is nothing unusual about the distribution of mutations in hypermutants, and nothing that should warrant their exclusion in significance analyses.

### 2.9. Explanatory power of genomic covariates differs among mutational processes

Although we previously showed in the Uniform Poisson regression model analysis that genomic covariates cannot fully explain all base-wise mutational variability, their explanatory power is nonzero. The LNP model provides a natural way to quantify the contribution of each covariate towards explaining this variability: the amount that  $e^\sigma$  decreases as we incorporate additional covariates corresponds directly to the variance explained by the added

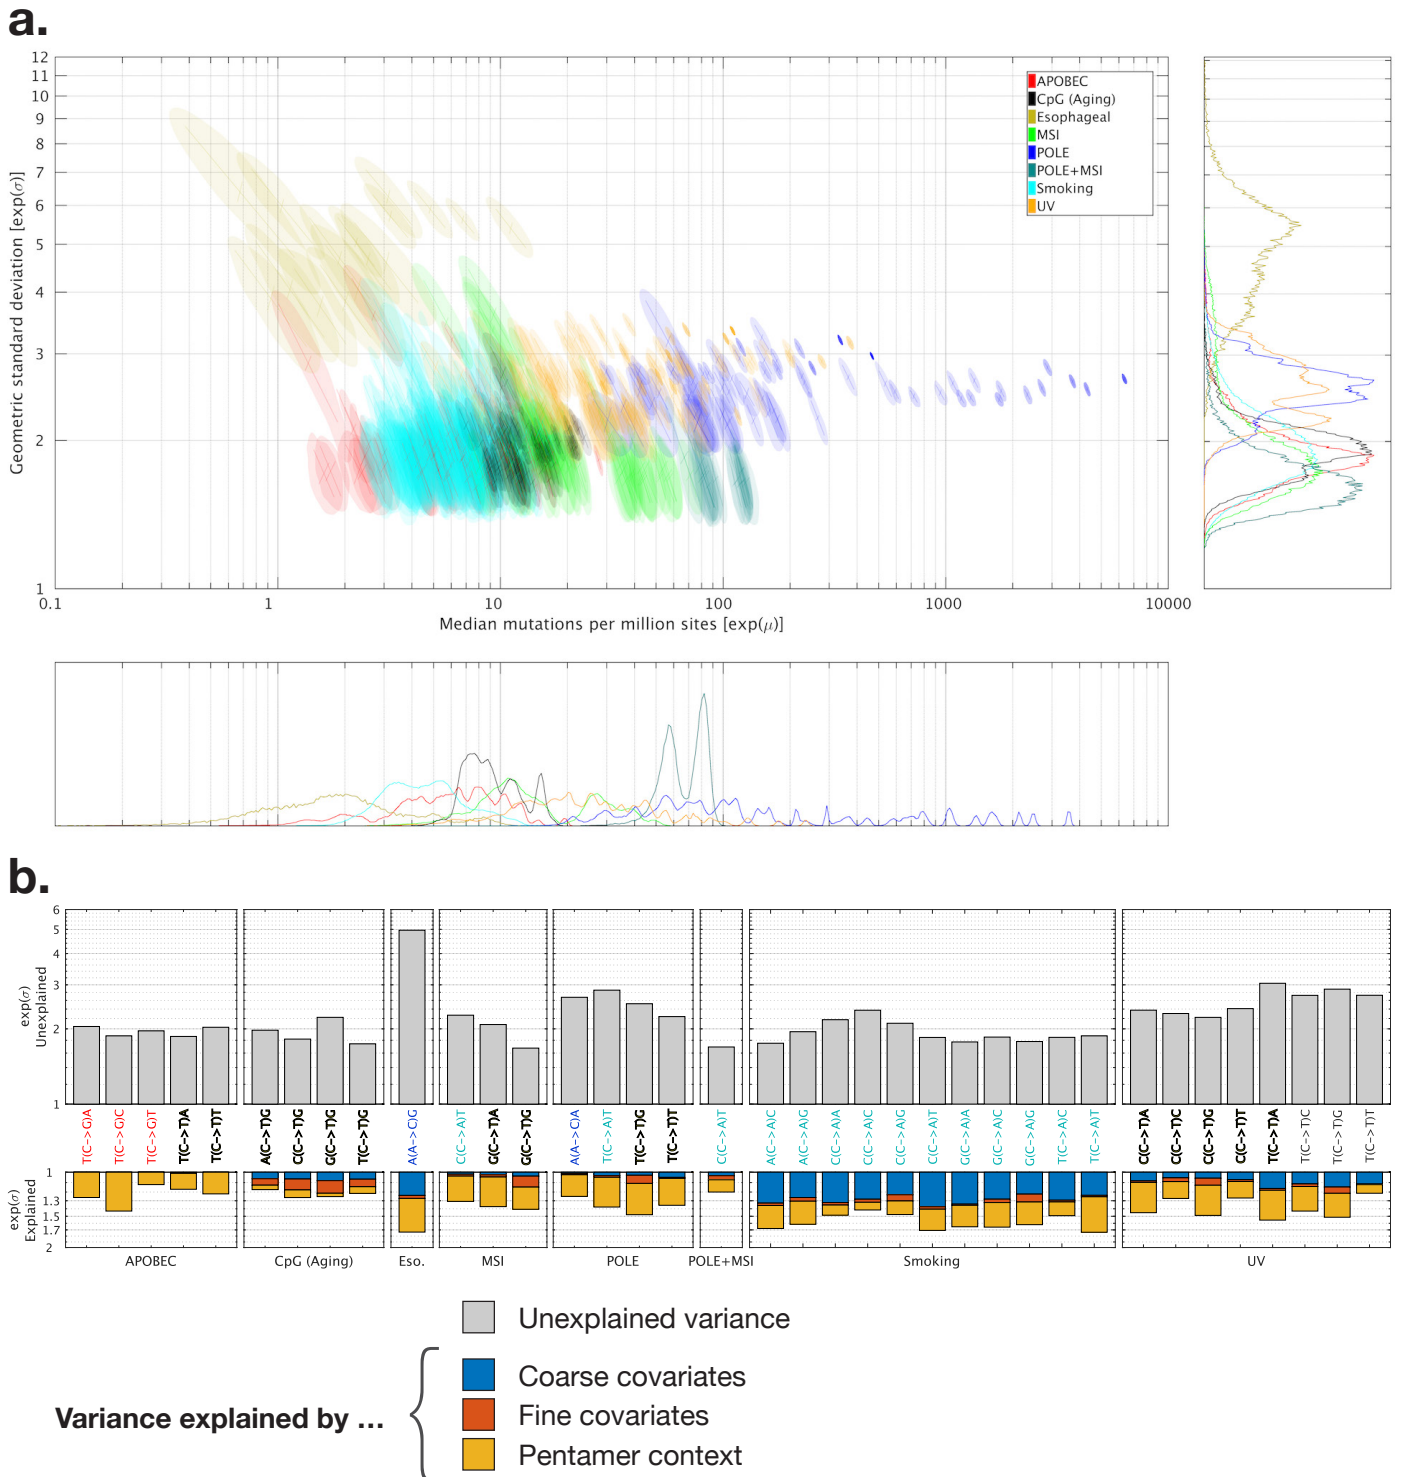

**Figure 4:** Comparison of the heterogeneity of base-wise mutability for different mutational processes as inferred by the log-normal-Poisson model. **a.** Log-normal-Poisson posterior distributions of base-wise mutation frequency (median mutations per million sites  $e^\mu$ ) and mutations' deviation from being uniformly Poisson distributed (geometric standard deviation  $e^\sigma$ ) for different mutational processes. Each colored area represents the posterior 95% confidence region for a pentamer context associated with a given mutational process (**Figure S4**).  $e^\sigma = 1$  corresponds to uniformly Poisson distributed mutations. Since  $e^\sigma > 1$  for all processes, we see that base-wise variability is universal and pervasive. Marginal distributions of  $e^\mu$  and  $e^\sigma$  are shown below and to the right of the plot, respectively. Lines within each region are principal axes of the posterior density (i.e., eigenvectors of the covariance matrix of the estimated posterior density). **b.** Amount of base-wise mutation rate variability  $e^\sigma$  explained by model covariates (colored), and remaining unexplained variance after all covariates have been incorporated (gray), for each relevant trinucleotide context in each mutational process.

covariates (STAR Methods). The value of  $e^\sigma$  after all covariates have been incorporated is the unexplained variance, which would approach  $e^\sigma = 1$  if the covariates completely explained the base-wise variability, as there would be no extra variance beyond what the covariates predict.

We grouped the covariates by genomic scale: replication timing and expression (Lawrence et al., 2013) influence mutation frequencies on a coarse scale ( $\sim 100$  kbp–1 Mbp), while nucleosome positions and DNase hypersensitivity influence mutation frequencies on a fine scale ( $\sim 10$  bp). We also quantified the effect of accounting for pentamer context specificity on mutation frequency (i.e., considering the flanking  $\pm 2$  upstream/downstream positions in addition to the immediate 5'/3' positions).

In **Figure 4b**, we plot the amount of total variance explained by the aforementioned covariate sets (coarse, fine, and context) and the amount of remaining unexplained variance for each of the trinucleotide contexts associated with each mutational signature. From this analysis, the following universal patterns stand out: (i) unexplained variance is higher than explained variance; (ii) pentamer contexts are almost always important (with the notable exception of the aging signature); and (iii) there is no correlation between the amount of unexplained variance and the amount of explained variance, and processes with more total variance do not necessarily have more variance explained by covariates.

For certain processes, genomic covariates are completely non-explanatory. For example, although certain APOBEC trinucleotides display considerable variability amongst pentamer contexts (Chan et al., 2015), neither coarse nor fine covariates explain any additional variability. Conversely, coarse covariates — namely gene expression — explain a substantial amount of smoking mutational variability. This is expected since the C→A mutations comprising the smoking signature are caused by benzo[ $\alpha$ ]pyrene guanine adducts (Denissenko et al., 1996), which are often corrected by transcription-coupled repair (Fousteri and Mullenders, 2008) that occurs more frequently in highly expressed genes (Pleasant et al., 2010).

### 3. Discussion

Discovering cancer drivers from sequencing data requires overcoming the problem of detecting signal (mutational recurrence) above a background of non-random noise (variable intrinsic mutability). We detect drivers by formulating a statistical model of the background mutability and then looking for recurrence that significantly exceeds the expected background. This approach is only fruitful and reliable if the underlying background model is accurate. As the corpus of cancer genomes has exponentially grown over the last decade, we have become statistically powered to observe background mutational variability at increasingly fine genomic scales, which we must accordingly account for in our background models. Initially, around 2007, cohorts were so small ( $\sim 10$  patients) that we lacked the power to observe any variability at all. Thus, models at the time assumed that every genomic region was equally mutable, which led to the belief that all recurrent mutation beyond a uniform background level stemmed from positive selection (Getz et al., 2007; Sjöblom et al., 2006). As cohorts grew to  $\sim 1,000$  patients, around 2013, we became powered to observe

heterogeneity on the scale of a gene, and infer that, contrary to the convention that every recurrently mutated gene had to be a driver, the majority of recurrently mutated genes were actually passengers with high intrinsic mutability. We therefore had to update our background models accordingly to avoid driver lists swamped by false positives. However, cohorts were still too small to estimate mutability on levels smaller than a gene, so models did not account for it. This led to the assumption that any base-pair recurrently mutated beyond the overall background level of its gene had to be a driver (Van den Eynden et al., 2015; Lohr et al., 2012; Lawrence et al., 2014; Chang et al., 2016; Araya et al., 2016; Baeissa et al., 2017).

We are able to challenge this assumption in the current era of cohorts comprising  $\sim 10,000$  patients, which powers us to estimate background mutability on the smallest possible genomic scale: that of the individual base-pair. In this paper, we have described a log-normal-Poisson (LNP) regression model that accurately models base-wise mutability, and in applying it to a  $\sim 10,000$  patient cohort, we demonstrate that base-wise mutational variability is so extreme that a large proportion of recurrently mutated base-pairs are in fact passengers. We show this by contrasting the LNP method to two toy models (Uniform-within-gene and Uniform Poisson) that purposefully do not account for base-wise variability. Unlike the majority of hotspots found significant by the LNP model, the majority of significant hotspots under the toy models are under no positive selection by orthogonal criteria.

Although our toy models are merely illustrative, many recently published algorithms intended for actual driver discovery do not account for base-wise variability in their background models. Using these inaccurate models, various groups reported long lists of significant hotspots with many likely false positives; in one example, 1,202 hotspots were found, even when using a highly stringent FDR cutoff of  $q \leq 0.01$  (Chang et al., 2016). Since FDRs are only meaningful if their underlying statistics are well calibrated, rigorous validation of the statistical models should be performed whenever the significance levels are overly confident. Failure to do so has potentially severe consequences in situations like identifying genes for deep experimental follow-up or as novel drug targets. Since such gene identification often begins by selecting recurrent alleles observed in sequencing data, followed by expensive follow-up experiments, properly accounting for base-wise variability is essential when selecting these candidates to avoid wasting valuable scientific resources on passenger hotspots.

In addition to providing an improved model for assessing mutational significance, our new LNP model also sheds light on the fundamental nature of mutagenesis. It has long been known that background mutability correlates with coarse scale genomic features, and more recent studies have shown that specific fine scale genomic features undergo localized hypermutation. We show here that neither of these factors can explain the amount of observed base-wise variability, suggesting that there are yet-undiscovered properties of the genome that affect mutability. To demonstrate this, we examined the effect of adding XR-seq coverage — an extrinsic measurement of nucleotide excision repair (NER) activity, used to repair pyrimidine dimers resulting from UV damage — as a covariate in our model. We found that this covariate explained an additional 10% of variance in the UV process-centric subcohort, indicating that many passenger UV hotspots occur at loci predictably

refractory to NER. Future studies may find more basic genomic features that could predict the XR-seq coverage or similar empirical measurements of mutability. These may include factors such as: (i) yet-unknown proteins bound to the DNA; (ii) tertiary structure of the DNA helix (Harteis and Schneider, 2014) (which can influence binding of such proteins); (iii) a combination of the two (a recent study (Mao et al., 2018) suggests that the binding of ETS transcription factors rotates adjacent pyrimidines into a more favorable conformation to form a cyclobutane dimer between adjacent C5-C6 bonds); (iv) local chromatin structure (which could affect gene expression or accessibility to mutagens or repair enzymes); or (v) sequence-specific polymerase error modes that our datasets are not yet powered to detect.

Accounting for all potential covariates, however, may never be able to fully explain the observed variability since the mutations we observe in a tumor genome are merely a static snapshot representing the product of many dynamically fluctuating mutational processes that have been active over the course of the tumor's life history. These processes' activity levels and bases-at-risk vary as a function of continuously changing factors like the tumor's microenvironment, mutagen exposure, or epigenetic state, which are complicated to model with static covariates. We probabilistically represent the unexplained variability with a log-normal distribution because it represents the net product of consecutive molecular events, each with some unknown probability of occurring.

Regardless of the underlying causes of the dramatic heterogeneity we observe in base-wise mutability, its existence has implications in the fields of molecular evolution and population genetics. We find that base-wise heterogeneity is pervasive across all mutational processes, including methylated-CpG deamination, which is overwhelmingly responsible for *de novo* germline mutations (Ehrlich and Wang, 1981; Hodgkinson and Eyre-Walker, 2011). This suggests that the infinite sites model underpinning many population genetics assumptions may be incorrect — for instance, the probability of identical alleles in multiple unrelated individuals originating from different common ancestors may be much higher than a naïve coalescent theory would predict. In addition, large-scale genomic organization has been thought to reflect coarse variability in background mutability (Chuang and Li, 2004), wherein genes more tolerant of mutation are thought to reside in more highly mutable regions of the genome. Variability at the base-pair level may equivalently mold genomic architecture on fine scales. For example, it has long been speculated that the sequence composition of immunoglobulin variable chains is specifically biased to induce AID hypermutation hotspots within domains encoding antigen-binding sites (Jolly et al., 1996) in order to accelerate the process of antigen selection. Genome-wide selective pressure may be analogously guided or constrained due to variable site-specific mutability.

In conclusion, further growth of cancer sequencing datasets will allow us to survey the landscape of drivers with even greater precision, reveal the intricacies of mutational processes, and even elucidate how these mutational processes shape evolutionary selection. But as datasets continually grow, we must continually challenge the statistical assumptions we make in analyzing them. As datasets evolve, so must our statistical methods and the conclusions we draw from them.

#### 4. Author Contributions

Conceptualization, J.M.H., M.S.L., G.G.; Methodology, J.M.H., G.G.; Software, J.M.H.; Formal Analysis and Investigation: J.M.H.; SignatureAnalyzer results, J.K.; Data Curation, J.M.H., M.S.L., A.B.; Visualization, J.M.H.; Writing: Original Draft, J.M.H., M.S.L., G.G.; Writing: Review and Editing, G.G., M.S.L., M.M., A.T.-W., N.J.H.; Supervision, G.G., M.S.L.; Funding Acquisition, G.G.

#### 5. Acknowledgements

We thank Daniel Rosebrock and Dimitri Livitz for providing *MYC* absolute copy number calls, Yosef Maruvka for providing microsatellite indel calls with respect to *UPF1* mutant status, and Chip Stewart for helpful comments on the manuscript. J.M.H. was funded by ... M.S.L. was partially funded by G.G. funds at Broad Institute and M.S.L. startup funds at Massachusetts General Hospital. G.G. was partially funded by Paul C. Zamecnik Chair in Oncology, MGH Cancer Center.

## 6. Bibliography

- Carlos L Araya, Can Cenik, Jason A Reuter, Gert Kiss, Vijay S Pande, Michael P Snyder, and William J Greenleaf. Identification of significantly mutated regions across cancer types highlights a rich landscape of functional molecular alterations. *Nat. Genet.*, 48(2):117–125, February 2016.
- Hanadi Baeissa, Graeme Benstead-Hume, Christopher J Richardson, and Frances M G Pearl. Identification and analysis of mutational hotspots in oncogenes and tumour suppressors. *Oncotarget*, 8(13):21290–21304, 2017.
- F Bahram, N von der Lehr, C Cetinkaya, and L G Larsson. c-myc hot spot mutations in lymphomas result in inefficient ubiquitination and decreased proteasome-mediated turnover. *Blood*, 95(6):2104–2110, March 2000.
- Matthew H Bailey, Collin Tokheim, Eduard Porta-Pardo, Sohini Sengupta, Denis Bertrand, Amila Weerasinghe, Antonio Colaprico, Michael C Wendl, Jaegil Kim, Brendan Reardon, Patrick Kwok Shing Ng, Kang Jin Jeong, Song Cao, Zixing Wang, Jianjong Gao, Qingsong Gao, Fang Wang, Eric Minwei Liu, Loris Mularoni, Carlota Rubio-Perez, Niranjan Nagarajan, Isidro Cortés-Ciriano, Daniel Cui Zhou, Wen Wei Liang, Julian M Hess, Venkata D Yellapantula, David Tamborero, Abel Gonzalez-Perez, Chayaporn Suphavilai, Jia Yu Ko, Ekta Khurana, Peter J Park, Eliezer M Van Allen, Han Liang, Samantha J Caesar-Johnson, John A Demchok, Ina Felau, Melpomeni Kasapi, Martin L Ferguson, Carolyn M Hutter, Heidi J Sofia, Roy Tarnuzzer, Zhining Wang, Liming Yang, Jean C Zenklusen, Jiashan (Julia) Zhang, Sudha Chudamani, Jia Liu, Laxmi Lolla, Rashi Naresh, Todd Pihl, Qiang Sun, Yunhu Wan, Ye Wu, Juok Cho, Timothy De-Freitas, Scott Frazer, Nils Gehlenborg, Gad Getz, David I Heiman, Jaegil Kim, Michael S Lawrence, Pei Lin, Sam Meier, Michael S Noble, Gordon Saksena, Doug Voet, Hailei Zhang, Brady Bernard, Nyasha Chambwe, Varsha Dhankani, Theo Knijnenburg, Roger Kramer, Kalle Leinonen, Yuexin Liu, Michael Miller, Sheila Reynolds, Ilya Shmulevich, Vesteinn Thorsson, Wei Zhang, Rehan Akbani, Bradley M Broom, Apurva M Hegde, Zhenlin Ju, Rupa S Kanchi, Anil Korhut, Jun Li, Han Liang, Shiyun Ling, Wenbin Liu, Yiling Lu, Gordon B Mills, Kwok Shing Ng, Arvind Rao, Michael Ryan, Jing Wang, John N Weinstein, Jiexin Zhang, Adam Abeshouse, Joshua Armenia, Debyani Chakravarty, Walid K Chatila, Ino de Bruijn, Jianjong Gao, Benjamin E Gross, Zachary J Heins, Ritika Kundra, Konnor La, Marc Ladanyi, Augustin Luna, Moriah G Nissan, Angelica Ochoa, Sarah M Phillips, Ed Reznik, Francisco Sanchez-Vega, Chris Sander, Nikolaus Schultz, Robert Sheridan, S Onur Sumer, Yichao Sun, Barry S Taylor, Jioajiao Wang, Hongxin Zhang, Pavana Anur, Myron Peto, Paul Spellman, Christopher Benz, Joshua M Stuart, Christopher K Wong, Christina Yau, D Neil Hayes, Joel S Parker, Matthew D Wilkerson, Adrian Ally, Miruna Balasundaram, Reanne Bowlby, Denise Brooks, Rebecca Carlsen, Eric Chuah, Noreen Dhalla, Robert Holt, Steven J M Jones, Katayoon Kasaian, Darlene Lee, Yussanne Ma, Marco A Marra, Michael Mayo, Richard A Moore, Andrew J Mungall, Karen Mungall, A Gordon Robertson, Sara Sadeghi, Jacqueline E Schein, Payal Siphimalani, Angela Tam, Nina Thiessen, Kane Tse, Tina Wong, Ashton C Berger, Rameen Beroukhim, Andrew D Cherniack, Carrie Cibulskis, Stacey B Gabriel, Galen F Gao, Gavin Ha, Matthew Meyerson, Steven E Schumacher, Juliann Shih, Melanie H Kucherlapati, Raju S Kucherlapati, Stephen Baylin, Leslie Cope, Ludmila Danilova, Moiz S Bootwalla, Phillip H Lai, Dennis T Maglinte, David J Van Den Berg, Daniel J Weisenberger, J Todd Auman, Saiannand Balu, Tom Bodenheimer, Cheng Fan, Katherine A Hoadley, Alan P Hoyle, Stuart R Jefferys, Corbin D Jones, Shaowu Meng, Piotr A Mieczkowski, Lisle E Mose, Amy H Perou, Charles M Perou, Jeffrey Roach, Yan Shi, Janae V Simons, Tara Skelly, Matthew G Soloway, Donghui Tan, Umadevi Veluvolu, Huihui Fan, Toshinori Hinoue, Peter W Laird, Hui Shen, Wanding Zhou, Michelle Bellair, Kyle Chang, Kyle Covington, Chad J Creighton, Huyen Dinh, Harsha Vardhan Doddapaneni, Lawrence A Donehower, Jennifer Drummond, Richard A Gibbs, Robert Glenn, Walker Hale, Yi Han, Jianhong Hu, Viktoriya Korchina, Sandra Lee, Lora Lewis, Wei Li, Xiuping Liu, Margaret Morgan, Donna Morton, Donna Muzny, Jireh Santibanez, Margi Sheth, Eve Shinbrot, Linghua Wang, Min Wang, David A Wheeler, Liu Xi, Fengmei Zhao, Julian Hess, Elizabeth L Appelbaum, Matthew Bailey, Matthew G Cordes, Li Ding, Catrina C Fronick, Lucinda A Fulton, Robert S Fulton, Cyriac Kandoth, Elaine R Mardis, Michael D McLellan, Christopher A Miller, Heather K Schmidt, Richard K Wilson, Daniel Crain, Erin Curley, Johanna Gardner, Kevin Lau, David Mallery, Scott Morris, Joseph Paulauskis, Robert Penny, Candace Shelton, Troy Shelton, Mark Sherman, Eric Thompson, Peggy Yena, Jay Bowen, Julie M Gastier-Foster, Mark Gerken, Kristen M Leraas, Tara M Lichtenberg, Nilsa C Ramirez, Lisa Wise, Erik Zmuda, Niall Corcoran, Tony Costello, Christopher Hovens, Andre L Carvalho, Ana C de Carvalho, José H Fregani, Adhemar Longatto-Filho, Rui M Reis, Cristovam Scapulatempo-Neto, Henrique C S Silveira, Daniel O Vidal, Andrew Burnette, Jennifer Eschbacher, Beth Hermes, Arden Noss, Rosy Singh, Matthew Anderson, Patricia D Castro, Michael Ittmann, David Huntsman, Bernard Kohl, Xuan Le, Richard Thorp, Chris Andry, Elizabeth R Duffy, Vladimir Lyadov, Oxana Paklina, Galiya Setdikova, Alexey Shabunin, Mikhail Tavobilov, Christopher McPherson, Ronald Warrick, Ross Berkowitz, Daniel Cramer, Colleen Feltmate, Neil Horowitz, Adam Kibel, Michael Muto, Chandrajit P Raut, Andrei Malykh, Jill S Barnholtz-Sloan, Wendi Barrett, Karen Devine, Jordonna Fulop, Quinn T Ostrom, Kristen Shimmel, Yingli Wolinsky, Andrew E Sloan, Agostino De Rose, Felice Giulianti, Marc Goodman, Beth Y Karlan, Curt H Hagedorn, John Eckman, Jodi Harr, Jerome Myers, Kelinda Tucker, Leigh Anne Zach, Brenda De-yarmin, Hai Hu, Leonid Kvecher, Caroline Larson, Richard J Mural, Stella Somari, Ales Vicha, Tomas Zelinka, Joseph Bennett, Mary Iacocca, Brenda Rabeno, Patricia Swanson, Mathieu Latour, Louis Lacombe, Bernard Têtu, Alain Bergeron, Mary McGraw, Susan M Staugaitis, John Chabot, Hanina Hibshoosh, Antonia Sepulveda, Tao Su, Timothy Wang, Olga Potapova, Olga Voronina, Laurence Desjardins, Odette Mariani, Sergio Roman-Roman, Xavier Sastre, Marc Henri Stern, Feixiong Cheng, Sabina Signoretti, Andrew Berchuck, Darell Bigner, Eric Lipp, Jeffrey Marks, Shannon McCall, Roger McLendon, Angeles Secord, Alexis Sharp, Madhusmita Behera, Daniel J Brat, Amy Chen, Keith Delman, Seth Force, Fadlo Khuri, Kelly Magliocca, Shishir Maithel, Jeffrey J Olson, Taofeek Owonikoko, Alan Pickens, Suresh Ramalingam, Dong M Shin, Gabriel Sica, Erwin G Van Meir, Hongzheng Zhang, Wil Eijckenboom, Ad Gillis, Esther Korpershoek, Leendert Looijenga, Wolter Oosterhuis, Hans Stoop, Kim E van Kessel, Ellen C Zwarthoff, Chiara Calatozzolo, Lucia Cuppini, Stefania Cuzzubbo, Francesco DiMeco, Gaetano Finocchiaro, Luca Mattei, Alessandro Perin, Bianca Pollo, Chu Chen, John Houck, Pawadee Lohavanichbut, Arndt Hartmann, Christine Stoehr, Robert Stoehr, Helge Taubert, Sven Wach, Bernd Wullich, Witold Kycler, Dawid Murawa, Maciej Wiznerowicz, Ki Chung, W Jeffrey Edenfield, Julie Martin, Eric Baudin, Glenn Bublely, Raphael Bueno, Assunta De Rienzo, William G Richards, Steven Kalkanis, Tom Mikkelsen, Houtan Noushmehr, Lisa Scarpace, Nicolas Girard, Marta Aymerich, Elias Campo, Eva Giné, Armando López Guillermo, Nguyen Van Bang, Phan Thi Hanh, Bui Duc Phu, Yufang Tang, Howard Colman, Kimberley Evason, Peter R Dottino, John A Martignetti, Hani Gabra, Hartmut Juhl, Teniola Akeredolu, Serghei Stepa, Dave Hoon, Keunsoo Ahn, Koo Jeong Kang, Felix Beuschlein, Anne Breggia, Michael Birrer, Debra Bell, Mitesh Borad, Alan H Bryce, Erik Castle, Vishal Chandan, John Cheville, John A Copland, Michael Farnell, Thomas Flotte, Nasra Giama, Thai Ho, Michael Kendrick, Jean Pierre Kocher, Karla Kopp, Catherine Moser, David Nagorney, Daniel O'Brien, Brian Patrick O'Neill, Tushar Patel, Gloria Petersen, Florencia Que, Michael Rivera, Lewis Roberts, Robert Smallridge, Thomas Smyrk, Melissa Stanton, R Houston Thompson, Michael Torbenson, Ju Dong Yang, Lizhi Zhang, Fadi Brimo, Jaffer A Ajani, Ana Maria Angulo Gonzalez, Carmen Behrens, Jolanta Bondaruk, Russell Broaddus, Bogdan Czerniak, Bitá Esmaeli, Junya Fujimoto, Jeffrey Gershenwald, Charles Guo, Alexander J Lazar, Christopher Logothetis, Funda Meric-Bernstam, Cesar Moran, Lois Ramondetta, David Rice, Anil Sood, Pheroze Tamboli, Timothy Thompson, Patricia Trncoso, Anne Tsao, Ignacio Wistuba, Candace Carter, Lauren Haydu, Peter Hersey, Valerie Jakrot, Hojabr Kakavand, Richard Kefford, Kenneth Lee, Georgina Long, Graham Mann, Michael Quinn, Robyn Saw, Richard Scolyer, Kerwin Shannon, Andrew Spillane, Jonathan Stretch, Maria Synott, John Thompson, James Wilmott, Hikmat Al-Ahmadie, Timothy A Chan, Ronald Ghossein, Anuradha Gopalan, Douglas A Levine, Victor Reuter, Samuel Singer, Bhuvanesh Singh, Nguyen Viet Tien, Thomas Broudy, Cyrus Mirsaidi, Praveen Nair, Paul Drwiega, Judy Miller, Jennifer Smith, Howard Zaren, Joong Won Park, Nguyen Phi Hung, Electron Kebebew, W Marston Linehan, Adam R Metwalli, Karel Pacak, Peter A Pinto, Mark Schiffman, Laura S Schmidt, Cathy D Vocke, Nicolas Wentzensen, Robert Worrell, Hannah Yang, Marc Moncrieff, Chandra Goparaju, Jonathan Melamed, Harvey Pass, Natalia Botnariuc, Irina Caraman, Mircea Cernat, Inga Chemencedji, Adrian Clipca, Serghei Doruc, Ghenadie Gorincioi, Sergiu Mura, Maria Pirtac, Irina Stancul, Diana Tcaciuc, Monique Albert, Iakovina Alexopoulou, Angel Arnaout, John Bartlett, Jay Engel, Sebastien Gilbert, Jeremy Parfitt, Harman Sekhon, George Thomas, Doris M Rassl, Robert C Rintoul, Carlo Bifulco, Raina Tamakawa, Walter Urba, Nicholas Hayward, Henri Timmers, Anna Antenucci, Francesco Facciolo, Gianluca Grazi, Mirella Marino, Roberta Merola, Ronald de Krijger, Anne Paule Gimenez-Roqueplo, Alain Piché, Simone Chevalier, Ginette McKecher, Kivanc Birsoy, Gene Barnett, Cathy Brewer, Carol Farver, Theresa Naska, Nathan A Pennell, Daniel Raymond, Cathy Schilero, Kathy Smolenski, Felicia Williams, Carl Morrison, Jeffrey A Borgia, Michael J Liptay, Mark Pool, Christopher W Seder, Kerstin Junker, Larsson Ombreg, Mikhail Dinkin, George Manikhas, Domenico Alvaro, Maria Consiglia Bragazzi, Vincenzo Cardinale, Guido Carpino, Eugenio Gaudio, David Chesla, Sandra Cottingham, Michael Dubina, Fedor Moiseenko, Renu-

- mathy Dhanasekaran, Karl Friedrich Becker, Klaus Peter Janssen, Julia Slotta-Huspenina, Mohamed H Abdel-Rahman, Dina Aziz, Sue Bell, Colleen M Cebulla, Amy Davis, Rebecca Duell, J Bradley Elder, Joe Hilty, Bahavna Kumar, James Lang, Norman L Lehman, Randy Mandt, Phuong Nguyen, Robert Pilarski, Karan Rai, Lynn Schoenfield, Kelly Senecal, Paul Wakely, Paul Hansen, Ronald Lechan, James Powers, Arthur Tischler, William E Grizzle, Katherine C Sexton, Alison Kastl, Joel Henderson, Sima Porten, Jens Waldmann, Martin Fassnacht, Sylvia L Asa, Dirk Schadendorf, Marta Couce, Markus Graefen, Hartwig Huland, Guido Sauter, Thorsten Schlomm, Ronald Simon, Pierre Tennstedt, Oluwole Olabode, Mark Nelson, Oliver Bathe, Peter R Carroll, June M Chan, Philip Disaia, Pat Glenn, Robin K Kelley, Charles N Landen, Joanna Phillips, Michael Prados, Jeffrey Simko, Karen Smith-McCune, Scott VandenBerg, Kevin Roggin, Ashley Fehrenbach, Ady Kandler, Suzanne Sifri, Ruth Steele, Antonio Jimeno, Francis Carey, Ian Forgie, Massimo Mannelli, Michael Carney, Brenda Hernandez, Benito Campos, Christel Herold-Mende, Christin Jungk, Andreas Unterberg, Andreas von Deimling, Aaron Bossler, Joseph Galbraith, Laura Jacobus, Michael Knudson, Tina Knutson, Deqin Ma, Mohammed Milhem, Rita Sigmund, Andrew K Godwin, Rashna Madan, Howard G Rosenthal, Clement Adebamowo, Sally N Adebamowo, Alex Boussioutas, David Beer, Thomas Giordano, Anne Marie Mes-Masson, Fred Saad, Therese Bocklage, Lisa Landrum, Robert Mannel, Kathleen Moore, Katherine Moxley, Russel Postier, Joan Walker, Rosemary Zuna, Michael Feldman, Federico Valdivieso, Rajiv Dhir, James Luketich, Edna M Mora Pinerol, Mario Quintero-Aguilo, Carlos Gilberto Carlotti, Jose Sebastião Dos Santos, Rafael Kemp, Ajith Sankarankuty, Daniela Tirapelli, James Catto, Kathy Agnew, Elizabeth Swisher, Jenette Creaney, Bruce Robinson, Carl Simon Shelley, Eryn M Godwin, Sara Kendall, Cassandra Shipman, Carol Bradford, Thomas Carey, Andrea Haddad, Jeffrey Moyer, Lisa Peterson, Mark Prince, Laura Rozek, Gregory Wolf, Rayleen Bowman, Kwun M Fong, Ian Yang, Robert Korst, W Kimryn Rathmell, J Leigh Fantacone-Campbell, Jeffrey A Hooke, Albert J Kovatich, Craig D Shriver, John DiPersio, Bettina Drake, Ramaswamy Govindan, Sharon Heath, Timothy Ley, Brian Van Tine, Peter Westervelt, Mark A Rubin, Jung Il Lee, Natália D Aredeas, Armaz Mariamidze, Michael S Lawrence, Adam Godzik, Nuria Lopez-Bigas, Josh Stuart, David Wheeler, Gad Getz, Ken Chen, Alexander J Lazar, Gordon B Mills, Rachel Karchin, and Li Ding. Comprehensive characterization of cancer driver genes and mutations. *Cell*, 173(2):371–385.e18, 2018.
- Rameen Beroukhi, Craig H Mermel, Dale Porter, Guo Wei, Soumya Raychaudhuri, Jerry Donovan, Jordi Barretina, Jesse S Boehm, Jennifer Dobson, Mitsuyoshi Urashima, Kevin T Mc Henry, Reid M Pinchback, Azra H Ligon, Yoon-Jae Cho, Leila Haery, Heidi Greulich, Michael Reich, Wendy Winckler, Michael S Lawrence, Barbara A Weir, Kumiko E Tanaka, Derek Y Chiang, Adam J Bass, Alice Loo, Carter Hoffman, John Prensner, Ted Liefeld, Qing Gao, Derek Yecies, Sabina Signoretti, Elizabeth Maher, Frederic J Kaye, Hidefumi Sasaki, Joel E Tepper, Jonathan A Fletcher, Josep Tabernero, José Baselga, Ming-Sound Tsao, Francesca Demicheli, Mark A Rubin, Pasi A Janne, Mark J Daly, Carmelo Nucera, Ross L Levine, Benjamin L Ebert, Stacey Gabriel, Anil K Rustgi, Cristina R Antonescu, Marc Ladanyi, Anthony Letai, Levi A Garraway, Massimo Loda, David G Beer, Lawrence D True, Aikou Okamoto, Scott L Pomeroy, Samuel Singer, Todd R Golub, Eric S Lander, Gad Getz, William R Sellers, and Matthew Meyerson. The landscape of somatic copy-number alteration across human cancers. *Nature*, 463(7283):899–905, February 2010.
- J Cairns. Mutation selection and the natural history of cancer. *Nature*, 255(5505):197–200, May 1975.
- Jennifer A Calvo, Catherine A Moroski-Erkul, Annabelle Lake, Lindsey W Eichinger, Dharini Shah, Iny Jhun, Prajit Limsirichai, Roderick T Bronson, David C Christiansi, Lisiane B Meira, and Leona D Samson. Aag DNA glycosylase promotes alkylation-induced tissue damage mediated by parp1. *PLoS Genet.*, 9(4):e1003413, April 2013.
- Kin Chan, Steven A Roberts, Leszek J Klimczak, Joan F Sterling, Natalie Saini, Ewa P Malc, Jaegil Kim, David J Kwiatkowski, David C Fargo, Piotr A Mieczkowski, Gad Getz, and Dmitry A Gordenin. An APOBEC3A hypermutation signature is distinguishable from the signature of background mutagenesis by APOBEC3B in human cancers. *Nat. Genet.*, 47(9):1067–1072, September 2015.
- Matthew T Chang, Saurabh Asthana, Sizhi Paul Gao, Byron H Lee, Jocelyn S Chapman, Cyriac Kandoth, Jian Jiong Gao, Nicholas D Socci, David B Solit, Adam B Olshen, Nikolaus Schultz, and Barry S Taylor. Identifying recurrent mutations in cancer reveals widespread lineage diversity and mutational specificity. *Nat. Biotechnol.*, 34(2):155–163, 2016.
- Jeffrey H Chuang and Hao Li. Functional bias and spatial organization of genes in mutational hot and cold regions in the human genome. *PLoS Biol.*, 2(2):253–263, 2004.
- Maura Costello, Trevor J Pugh, Timothy J Fennell, Chip Stewart, Lee Lichtenstein, James C Meldrim, Jennifer L Foster, Dennis C Friedrich, Danielle Perrin, Danielle Dionne, Sharon Kim, Stacey B Gabriel, Eric S Lander, Sheila Fisher, and Gad Getz. Discovery and characterization of artifactual mutations in deep coverage targeted capture sequencing data due to oxidative DNA damage during sample preparation. *Nucleic Acids Res.*, 41(6):e67, April 2013.
- Helen Davies, Graham R Bignell, Charles Cox, Philip Stephens, Sarah Edkins, Sheila Clegg, Jon Teague, Hayley Woffendin, Mathew J Garnett, William Bottomley, Neil Davis, Ed Dicks, Rebecca Ewing, Yvonne Floyd, Kristian Gray, Sarah Hall, Rachel Hawes, Jaime Hughes, Vivian Kosmidou, Andrew Menzies, Catherine Mould, Adrian Parker, Claire Stevens, Stephen Watt, Steven Hooper, Rebecca Wilson, Hiran Jayatilake, Barry A Gusterson, Colin Cooper, Janet Shipley, Darren Hargrave, Katherine Pritchard-Jones, Norman Maitland, Georgia Chenevix-Trench, Gregory J Riggins, Darell D Bigner, Giuseppe Palmieri, Antonio Cossu, Adrienne Flanagan, Andrew Nicholson, Judy W C Ho, Suet Y Leung, Siu T Yuen, Barbara L Weber, Hiliard F Seigler, Timothy L Darrow, Hugh Paterson, Richard Marais, Christopher J Marshall, Richard Wooster, Michael R Stratton, and P Andrew Futreal. 6-mutations of the BRAF gene in human cancer. *Nature*, 417(6892):949–954, 2002.
- Nathan D Dees, Qunyan Zhang, Cyriac Kandoth, Michael C Wendl, William Schierding, Daniel C Koboldt, Thomas B Mooney, Matthew B Callaway, David Dooling, Elaine R Mardis, Richard K Wilson, and Li Ding. MuSiC: identifying mutational significance in cancer genomes. *Genome Res.*, 22(8):1589–1598, August 2012.
- M F Denissenko, A Pao, M Tang, and Gerd P Pfeifer. Preferential formation of benzo[a]pyrene adducts at lung cancer mutational hotspots in P53. *Science*, 274(5286):430–432, October 1996.
- Thomas Derrien, Jordi Estellé, Santiago Marco Sola, David G Knowles, Emanuele Raineri, Roderic Guigó, and Paolo Ribeca. Fast computation and applications of genome mappability. *PLoS One*, 7(1):e30377, January 2012.
- Austin M Dulak, Petar Stojanov, Shouyong Peng, Michael S Lawrence, Cameron Fox, Chip Stewart, Santhoshi Bandla, Yu Imamura, Steven E Schumacher, Erica Shefler, Aaron McKenna, Scott L Carter, Kristian Cibulskis, Andrey Sivachenko, Gordon Saksena, Douglas Voet, Alex H Ramos, Daniel Auclair, Kristin Thompson, Carrie Sougnez, Robert C Onofrio, Candace Guiducci, Rameen Beroukhi, Zhongren Zhou, Lin Lin, Jules Lin, Rishindra Reddy, Andrew Chang, Rodney Landrenau, Arjun Pennathur, Shuji Ogino, James D Luketich, Todd R Golub, Stacey B Gabriel, Eric S Lander, David G Beer, Tony E Godfrey, Gad Getz, and Adam J Bass. Exome and whole-genome sequencing of esophageal adenocarcinoma identifies recurrent driver events and mutational complexity. *Nat. Genet.*, 45(5):478–486, May 2013.
- Katrin Eckhardt, Juliane Troger, Jana Reissmann, Dörthe M Katschinski, Klaus F Wagner, Petra Stengel, Uwe Paasch, Peter Hunziker, Emanuela Borter, Sandra Barth, Philipp Schlafl, Patrick Spielmann, Daniel P Stiehl, Gieri Camenisch, and Roland H Wenger. Male germ cell expression of the PAS domain kinase PASKIN and its novel target eukaryotic translation elongation factor eEF1A1. *Cell. Physiol. Biochem.*, 20(1-4):227–240, 2007.
- M Ehrlich and R Y Wang. 5-methylcytosine in eukaryotic DNA. *Science*, 212(4501):1350–1357, June 1981.
- Kyle Ellrott, Matthew H Bailey, Gordon Saksena, Kyle R Covington, Cyriac Kandoth, Chip Stewart, Julian Hess, Singer Ma, Kami E Chiotti, Michael McLellan, Heidi J Sofia, Carolyn Hutter, Gad Getz, David Wheeler, Li Ding, Samantha J Caesar-Johnson, John A Demchok, Ina Felau, Melpomeni Kasapi, Martin L Ferguson, Carolyn M Hutter, Heidi J Sofia, Roy Tarnuzzer, Zhining Wang, Liming Yang, Jean C Zenklusen, Jiashan (Julia) Zhang, Sudha Chudamani, Jia Liu, Laxmi Lolla, Rashi Naresh, Todd Pihl, Qiang Sun, Yunhu Wan, Ye Wu, Juok Cho, Timothy DeFreitas, Scott Frazer, Nils Gehlenborg, Gad Getz, David I Heiman, Jaegil Kim, Michael S Lawrence, Pei Lin, Sam Meier, Michael S Noble, Gordon Saksena, Doug Voet, Hailei Zhang, Brady Bernard, Nyasha Chambwe, Varsha Dhankani, Theo Knijnenburg, Roger Kramer, Kalle Leinonen, Yuexin Liu, Michael Miller, Sheila Reynolds, Ilya Shmulevich, Vesteinn Thorsson, Wei Zhang, Rehan Akbani, Bradley M Broom, Apurva M Hegde, Zhenlin Ju, Rupa S Kanchi, Anil Korkut, Jun Li, Han Liang, Shiyun Ling, Wenbin Liu, Yiling Lu, Gordon B Mills, Kwok Shing Ng, Arvind Rao, Michael Ryan, Jing Wang, John N Weinstein, Jiexin Zhang, Adam Abeshouse, Joshua Armenia, Debyani Chakravarty, Walid K Chatila, Ino de Bruijn, Jianjiong Gao, Benjamin E Gross, Zachary J Heins, Ritika Kundra, Konnor La, Marc Ladanyi, Augustin Luna, Moriah G Nisan, Angelica Ochoa, Sarah M Phillips, Ed Reznik, Francisco Sanchez-Vega, Chris Sander, Nikolaus Schultz, Robert Sheridan, S Onur Sumer, Yichao Sun, Barry S Taylor, Jioajiao Wang, Hongxin Zhang, Pavana Anur, Myron Peto, Paul

Spellman, Christopher Benz, Joshua M Stuart, Christopher K Wong, Christina Yau, D Neil Hayes, Parker, Matthew D Wilkerson, Adrian Ally, Miruna Balasundaram, Reanne Bowlby, Denise Brooks, Rebecca Carlsen, Eric Chuah, Noreen Dhalla, Robert Holt, Steven J M Jones, Katayoon Kasaian, Darlene Lee, Yussanne Ma, Marco A Marra, Michael Mayo, Richard A Moore, Andrew J Mungall, Karen Mungall, A Gordon Robertson, Sara Sadeghi, Jacqueline E Schein, Payal Sipahimalani, Angela Tam, Nina Thiessen, Kane Tse, Tina Wong, Ashton C Berger, Rameen Beroukhi, Andrew D Cherniack, Carrie Cibulskis, Stacey B Gabriel, Galen F Gao, Gavin Ha, Matthew Meyerson, Steven E Schumacher, Juliann Shih, Melanie H Kucherlapati, Raju S Kucherlapati, Stephen Baylin, Leslie Cope, Ludmila Danilova, Moiz S Bootwalla, Phillip H Lai, Dennis T Maglinte, David J Van Den Berg, Daniel J Weisenberger, J Todd Auman, Saianand Balu, Tom Bodenheimer, Cheng Fan, Katherine A Hoadley, Alan P Hoyle, Stuart R Jefferys, Corbin D Jones, Shaowu Meng, Piotr A Mieczkowski, Lisle E Mose, Amy H Perou, Charles M Perou, Jeffrey Roach, Yan Shi, Janae V Simons, Tara Skelly, Matthew G Soloway, Donghui Tan, Umadevi Veluvolu, Huihui Fan, Toshinori Hinoue, Peter W Laird, Hui Shen, Wanding Zhou, Michelle Bellair, Kyle Chang, Kyle Covington, Chad J Creighton, Huyen Dinh, Harsha Vardhan Doddapaneni, Lawrence A Donehower, Jennifer Drummond, Richard A Gibbs, Robert Glenn, Walker Hale, Yi Han, Jianhong Hu, Viktoriya Korchina, Sandra Lee, Lora Lewis, Wei Li, Xiuping Liu, Margaret Morgan, Donna Morton, Donna Muzny, Jireh Santibanez, Margi Sheth, Eve Shinbrot, Linghua Wang, Min Wang, David A Wheeler, Liu Xi, Fengmei Zhao, Julian Hess, Elizabeth L Appelbaum, Matthew Bailey, Matthew G Cordes, Li Ding, Catrina C Fronick, Lucinda A Fulton, Robert S Fulton, Cyriac Kandathil, Elaine R Mardis, Michael D McLellan, Christopher A Miller, Heather K Schmidt, Richard K Wilson, Daniel Crain, Erin Curley, Johanna Gardner, Kevin Lau, David Mallory, Scott Morris, Joseph Paulauskis, Robert Penny, Candace Shelton, Troy Shelton, Mark Sherman, Eric Thompson, Peggy Yena, Jay Bowen, Julie M Gastier-Foster, Mark Gerken, Kristen M Leraas, Tara M Lichtenberg, Nilsa C Ramirez, Lisa Wise, Erik Zmuda, Niall Corcoran, Tony Costello, Christopher Hovens, Andre L Carvalho, Ana C de Carvalho, José H Fregnani, Adhemar Longatto-Filho, Rui M Reis, Cristovam Scapulatempo-Neto, Henrique C S Silveira, Daniel O Vidal, Andrew Burnette, Jennifer Eschbacher, Beth Hermes, Ardene Noss, Rosy Singh, Matthew L Anderson, Patricia D Castro, Michael Ittmann, David Huntsman, Bernard Kohl, Xuan Le, Richard Thorp, Chris Andry, Elizabeth R Duffy, Vladimir Lyadov, Oxana Paklina, Galiya Setdikova, Alexey Shabunin, Mikhail Tavobilov, Christopher McPherson, Ronald Warnick, Ross Berkowitz, Daniel Cramer, Colleen Feltmate, Neil Horowitz, Adam Kibel, Michael Muto, Chandrajit P Raut, Andrei Malykh, Jill S Barnholtz-Sloan, Wendi Barrett, Karen Devine, Jordonna Fulop, Quinn T Ostrom, Kristen Shimmel, Yingli Wolinsky, Andrew E Sloan, Agostino De Rose, Felice Giuliano, Marc Goodman, Beth Y Karlan, Curt H Hagedorn, John Eckman, Jodi Harr, Jerome Myers, Kelinda Tucker, Leigh Anne Zach, Brenda Deyarmin, Hai Hu, Leonid Kvecher, Caroline Larson, Richard J Mural, Stella Somari, Ales Vicha, Tomas Zelinka, Joseph Bennett, Mary Iacocca, Brenda Rabeno, Patricia Swanson, Mathieu Latour, Louis Lacombe, Bernard Têtu, Alain Bergeron, Mary McGraw, Susan M Staugaitis, John Chabot, Hanina Hibshoosh, Antonia Sepulveda, Tao Su, Timothy Wang, Olga Potapova, Olga Voronina, Laurence Desjardins, Odette Mariani, Sergio Roman-Roman, Xavier Sastre, Marc Henri Stern, Feixiong Cheng, Sabina Signoretti, Andrew Berchuck, Darell Bigner, Eric Lipp, Jeffrey Marks, Shannon McCall, Roger McLendon, Angeles Secord, Alexis Sharp, Madhusmita Behera, Daniel J Brat, Amy Chen, Keith Delman, Seth Force, Fadlo Khuri, Kelly Magliocca, Shishir Maithel, Jeffrey J Olson, Taofeek Owonikoko, Alan Pickens, Suresh Ramalingam, Dong M Shin, Gabriel Sica, Erwin G Van Meir, Hongzheng Zhang, Wil Eijckenboom, Ad Gillis, Esther Korpershoek, Leendert Looijenga, Wolter Oosterhuis, Hans Stoop, Kim E van Kessel, Ellen C Zwarthoff, Chiara Calatozzolo, Lucia Cuppini, Stefania Cuzzubbo, Francesco DiMeo, Gaetano Finocchiaro, Luca Mattei, Alessandro Perin, Bianca Pollo, Chu Chen, John Houck, Pawadee Lohavanichbutr, Arndt Hartmann, Christine Stoeher, Robert Stoeher, Helge Taubert, Sven Wach, Bernd Wullich, Witold Kycier, Dawid Murawa, Maciej Wiznerowicz, Ki Chung, W Jeffrey Edenfield, Julie Martin, Eric Baudin, Glenn Buble, Raphael Bueno, Assunta De Rienzo, William G Richards, Steven Kalkanis, Tom Mikkelsen, Houtan Noushmehr, Lisa Scarpace, Nicolas Girard, Marta Aymerich, Elias Campo, Eva Giné, Armando López Guillermo, Nguyen Van Bang, Phan Thi Hanh, Bui Duc Phu, Yufang Tang, Howard Colman, Kimberley Evason, Peter R Dottino, John A Martignetti, Hani Gabra, Hartmut Juhl, Teniola Akeredolu, Serghei Stepa, Dave Hoon, Keunsoo Ahn, Koo Jeong Kang, Felix Beuschlein, Anne Breggia, Michael Birrer, Debra Bell, Mitesh Borad, Alan H Bryce, Erik Castle, Vishal Chandan, John Cheville, John A Copland, Michael Farnell, Thomas Flotte, Nasra Gilama, Thai Ho, Michael Kendrick, Jean Pierre Kocher, Karla Kopp, Catherine

Moser, David Nagorney, Daniel O'Brien, Brian Patrick O'Neill, Tushar Patel, Gloria Petersen, Florencia Que, Michael Rivera, Lewis Roberts, Robert Smallridge, Thomas Smyrk, Melissa Stanton, R Houston Thompson, Michael Torbenson, Ju Dong Yang, Lizhi Zhang, Fadi Brimo, Jaffer A Ajani, Ana Maria Angulo Gonzalez, Carmen Behrens, Jolanta Bondaruk, Russell Broaddus, Bogdan Czeraniak, Bitá Esmaeli, Junya Fujimoto, Jeffrey Gershenwald, Charles Guo, Alexander J Lazar, Christopher Logothetis, Funda Meric-Bernstam, Cesar Moran, Lois Ramondetta, David Rice, Anil Sood, Pheroze Tamboli, Timothy Thompson, Patricia Troncoso, Anne Tsao, Ignacio Wistuba, Candace Carter, Lauren Haydu, Peter Hersey, Valerie Jakrot, Hojabr Kakavand, Richard Kefford, Kenneth Lee, Georgina Long, Graham Mann, Michael Quinn, Robyn Saw, Richard Scolyer, Kerwin Shannon, Andrew Spillane, Jonathan Stretch, Maria Synott, John Thompson, James Wilmott, Hikmat Al-Ahmadie, Timothy A Chan, Ronald Gossesin, Anuradha Gopalan, Douglas A Levine, Victor Reuter, Samuel Singer, Bhuvanesh Singh, Nguyen Viet Tien, Thomas Broudy, Cyrus Mirsaidi, Praveen Nair, Paul Drwiega, Judy Miller, Jennifer Smith, Howard Zaren, Joong Won Park, Nguyen Phi Hung, Electron Kebebew, W Marston Linehan, Adam R Metwalli, Karel Pacak, Peter A Pinto, Mark Schiffman, Laura S Schmidt, Cathy D Vocke, Nicolas Wentzensen, Robert Worrell, Hannah Yang, Marc Moncrieff, Chandra Goparaju, Jonathan Melamed, Harvey Pass, Natalia Botnariuc, Irina Caraman, Mircea Cernat, Inga Chemencedji, Adrian Clipca, Serghei Doruc, Ghenadie Gorincioi, Sergiu Mura, Maria Pirtac, Irina Stancul, Diana Tcaciu, Monique Albert, Iakovina Alexopoulou, Angel Arnaout, John Bartlett, Jay Engel, Sebastien Gilbert, Jeremy Parfitt, Harman Sekhon, George Thomas, Doris M Rassl, Robert C Rintoul, Carlo Bifulco, Raina Tamakawa, Walter Urba, Nicholas Hayward, Henri Timmers, Anna Antenucci, Francesco Facciolo, Gianluca Grazi, Mirella Marino, Roberta Merola, Ronald de Krijger, Anne Paule Gimenez-Roqueplo, Alain Piché, Simone Chevalier, Ginette Mc Kercher, Kivanc Birsoy, Gene Barnett, Cathy Brewer, Carol Farver, Theresa Naska, Nathan A Pennell, Daniel Raymond, Cathy Schilero, Kathy Smolenski, Felicia Williams, Carl Morrison, Jeffrey A Borgia, Michael J Liptay, Mark Pool, Christopher W Seder, Kerstin Junker, Larsson Omberg, Mikhail Dinkin, George Manikhas, Domenico Alvaro, Maria Consiglia Bragazzi, Vincenzo Cardinale, Guido Carpino, Eugenio Gaudio, David Chesla, Sandra Cottingham, Michael Dubina, Fedor Moiseenko, Renu-mathy Dhanasekaran, Karl Friedrich Becker, Klaus Peter Janssen, Julia Slotta-Huspenina, Mohamed H Abdel-Rahman, Dina Aziz, Sue Bell, Colleen M Cebulla, Amy Davis, Rebecca Duell, J Bradley Elder, Joe Hilty, Bahavna Kumar, James Lang, Norman L Lehman, Randy Mandt, Phuonng Nguyen, Robert Pilarski, Karan Rai, Lynn Schoenfeld, Kelly Senecal, Paul Wakely, Paul Hansen, Ronald Lechan, James Powers, Arthur Tischler, William E Grizzle, Katherine C Sexton, Alison Kastl, Joel Henderson, Sima Porten, Jens Waldmann, Martin Fassnacht, Sylvia L Asa, Dirk Schadendorf, Marta Couce, Markus Graefen, Hartwig Huland, Guido Sauter, Thorsten Schlomm, Ronald Simon, Pierre Tennstedt, Oluwole Olabode, Mark Nelson, Oliver Bathe, Peter R Carroll, June M Chan, Philip Disaia, Pat Glenn, Robin K Kelley, Charles N Landen, Joanna Phillips, Michael Prados, Jeffrey Simko, Karen Smith-McCune, Scott Vandenberg, Kevin Roggin, Ashley Fehrenbach, Ady Kendler, Suzanne Sifri, Ruth Steele, Antonio Jimeno, Francis Carey, Ian Forgie, Massimo Mannelli, Michael Carney, Brenda Hernandez, Benito Campos, Christel Herold-Mende, Christin Jungk, Andreas Unterberg, Andreas von Deimling, Aaron Bossler, Joseph Galbraith, Laura Jacobus, Michael Knudson, Tina Knutson, Deqin Ma, Mohammed Milhem, Rita Sigmund, Andrew K Godwin, Rashna Madan, Howard G Rosenthal, Clement Adebamowo, Sally N Adebamowo, Alex Boussioutas, David Beer, Thomas Giordano, Anne Marie Mes-Masson, Fred Saad, Therese Bocklage, Lisa Landrum, Robert Mannel, Kathleen Moore, Katherine Moxley, Russel Postier, Joan Walker, Rosemary Zuna, Michael Feldman, Federico Valdivieso, Rajiv Dhir, James Luketich, Edna M Mora Pinero, Mario Quintero-Aguilo, Carlos Gilberto Carlotti, Jose Sebastião Dos Santos, Rafael Kemp, Ajith Sankarankuty, Daniela Tirapelli, James Catto, Kathy Agnew, Elizabeth Swisher, Jenette Creaney, Bruce Robinson, Carl Simon Shelley, Eryn M Godwin, Sara Kendall, Cassandra Shipman, Carol Bradford, Thomas Carey, Andrea Haddad, Jeffrey Moyer, Lisa Peterson, Mark Prince, Laura Rozek, Gregory Wolf, Rayleen Bowman, Kwun M Fong, Ian Yang, Robert Korst, W Kimryn Rathmell, J Leigh Fantacone-Campbell, Jeffrey A Hooke, Albert J Kovatich, Craig D Shriver, John DiPersio, Bettina Drake, Ramaswamy Govindan, Sharon Heath, Timothy Ley, Brian Van Tine, Peter Westervelt, Mark A Rubin, Jung Il Lee, Natália D Aredes, and Armaz Mariamidze. Scalable open science approach for mutation calling of tumor exomes using multiple genomic pipelines. *Cell Systems*, 6(3):271–281.e7, 2018.

J K Field and D A Spandidos. The role of ras and myc oncogenes in human solid tumours and their relevance in diagnosis and prognosis (review). *Anticancer Res.*, 10(1):1–22, 1990.

- Maria Fousteri and Leon H F Mullenders. Transcription-coupled nucleotide excision repair in mammalian cells: Molecular mechanisms and biological effects. *Cell Res.*, 18(1):73–84, 2008.
- Jill O Fuss and John A Tainer. XPB and XPD helicases in TFIIH orchestrate DNA duplex opening and damage verification to coordinate repair with transcription and cell cycle via CAK kinase. *DNA Repair*, 10(7):697–713, July 2011.
- P Andrew Futreal, Lachlan Coin, Mhairi Marshall, Thomas Down, Timothy Hubbard, Richard Wooster, Nazneen Rahman, and Michael R Stratton. A census of human cancer genes. *Nat. Rev. Cancer*, 4(3):177–183, 2004.
- A Gampel, P J Parker, and H Mellor. Regulation of epidermal growth factor receptor traffic by the small GTPase rhob. *Curr. Biol.*, 9(17):955–958, September 1999.
- Gad Getz, Holger Höfling, Jill P Mesirov, Todd R Golub, Matthew Meyerson, Robert Tibshirani, and Eric S Lander. Comment on “the consensus coding sequences of human breast and colorectal cancers”. *Science*, 317(5844):1500, September 2007.
- S M Graham, A D Cox, G Drivas, M G Rush, P D'Eustachio, and C J Der. Aberrant function of the ras-related protein TC21/R-Ras2 triggers malignant transformation. *Mol. Cell. Biol.*, 14(6):4108–4115, June 1994.
- Chris Greenman, Richard Wooster, P Andrew Futreal, Michael R Stratton, and Douglas F Easton. Statistical analysis of pathogenicity of somatic mutations in cancer. *Genetics*, 173(4):2187–2198, 2006.
- GTEX Consortium, Laboratory, Data Analysis & Coordinating Center (LDACC)—Analysis Working Group, Statistical Methods groups—Analysis Working Group, Enhancing GTEx (eGTEx) groups, NIH Common Fund, NIH/NCI, NIH/NHGRI, NIH/NIMH, NIH/NIDA, Biospecimen Collection Source Site—NDRI, Biospecimen Collection Source Site—RPCI, Biospecimen Core Resource—VARI, Brain Bank Repository—University of Miami Brain Endowment Bank, Leidos Biomedical—Project Management, ELSI Study, Genome Browser Data Integration & Visualization—EBI, Genome Browser Data Integration & Visualization—UCSC Genomics Institute, University of California Santa Cruz, Lead analysts:, Laboratory, Data Analysis & Coordinating Center (LDACC):, NIH program management:, Biospecimen collection:, Pathology:, eQTL manuscript working group:, Alexis Battle, Christopher D Brown, Barbara E Engelhardt, and Stephen B Montgomery. Genetic effects on gene expression across human tissues. *Nature*, 550(7675):204–213, October 2017.
- N J Haradhvala, J Kim, Y E Maruvka, P Polak, D Rosebrock, D Livitz, J M Hess, I Leshchiner, A Kamburov, K W Mouw, M S Lawrence, and G Getz. Distinct mutational signatures characterize concurrent loss of polymerase proofreading and mismatch repair. *Nat. Commun.*, 9(1):1746–1746, May 2018.
- Sabrina Harteis and Sabine Schneider. Making the bend: DNA tertiary structure and protein-DNA interactions. *Int. J. Mol. Sci.*, 15(7):12335–12363, July 2014.
- Alan Hodgkinson and Adam Eyre-Walker. Variation in the mutation rate across mammalian genomes. *Nat. Rev. Genet.*, 12(11):756–766, October 2011.
- Carolyn D Hurst, Olivia Alder, Fiona M Platt, Alastair Droop, Lucy F Stead, Julie E Burns, George J Burghel, Sunjay Jain, Leszek J Klimczak, Helen Lindsay, Jo-An Roulson, Claire F Taylor, Helene Thygesen, Angus J Cameron, Anne J Ridley, Helen Ruth Mott, Dmitry A Gordenin, and Margaret A Knowles. Genomic subtypes of non-invasive bladder cancer with distinct metabolic profile and female gender bias in KDM6A mutation frequency. *Cancer Cell*, 2017.
- George S Hussey, Arindam Chaudhury, Andrea E Dawson, Daniel J Lindner, Charlotte R Knudsen, Matthew C J Wilce, William C Merrick, and Philip H Howe. Identification of an mRNP complex regulating tumorigenesis at the translational elongation step. *Mol. Cell*, 41(4):419–431, February 2011.
- Marcin Imielinski, Guangwu Guo, and Matthew Meyerson. Insertions and deletions target Lineage-Defining genes in human cancers. *Cell*, 168(3):460–472.e14, 2017.
- Christopher J Jolly, Simon D Wagner, Cristina Rada, Norman Klix, César Milstein, and Michael S Neuberger. The targeting of somatic hypermutation. *Semin. Immunol.*, 8(3):159–168, 1996.
- Riku Katainen, Kashyap Dave, Esa Pitkänen, Kimmo Palin, Teemu Kivioja, Niko Välimäki, Alexandra E Gylfe, Heikki Ristolainen, Ulrika A Hänninen, Tatiana Cajuso, Johanna Kondelin, Tomas Tanskanen, Jukka-Pekka Mecklin, Heikki Järvinen, Laura Renkonen-Sinisalo, Anna Lepistö, Eevi Kaasinen, Outi Kilpivaara, Sari Tuupanen, Martin Enge, Jussi Taipale, and Lauri A Aaltonen. CTCF/cohesin-binding sites are frequently mutated in cancer. *Nat. Genet.*, advance on(7):818–821, 2015.
- Jaegil Kim, Kent W Mouw, Paz Polak, Lior Z Braunstein, Atanas Kamburov, Grace Tiao, David J Kwiatkowski, Jonathan E Rosenberg, Eliezer M Van Allen, Alan D D'Andrea, and Gad Getz. Somatic ERCC2 mutations are associated with a distinct genomic signature in urothelial tumors. *Nat. Genet.*, 48(6):600–606, 2016.
- Motoo Kimura. Preponderance of synonymous changes as evidence for the neutral theory of molecular evolution [33]. *Nature*, 267(5608):275–276, 1977.
- Michael S Lawrence, Petar Stojanov, Paz Polak, Gregory V Kryukov, Kristian Cibulskis, Andrey Sivachenko, Scott L Carter, Chip Stewart, Craig H Mermel, Steven A Roberts, Adam Kiezun, Peter S Hammerman, Aaron McKenna, Yotam Drier, Lihua Zou, Alex H Ramos, Trevor J Pugh, Nicolas Stransky, Elena Helman, Jaegil Kim, Carrie Sougnez, Lauren Ambrogio, Elizabeth Nickerson, Erica Sheffer, Maria L Cortés, Daniel Auclair, Gordon Saksena, Douglas Voet, Michael Noble, Daniel Dicara, Pei Lin, Lee Lichtenstein, David I Heiman, Timothy Fennell, Marcin Imielinski, Bryan Hernandez, Eran Hodis, Sylvan Baca, Austin M Dulak, Jens Lohr, Dan Avi Landau, Catherine J Wu, Jorge Melendez-Zajgla, Alfredo Hidalgo-Miranda, Amnon Koren, Steven A McCarroll, Jaume Mora, Ryan S Lee, Brian Crompton, Robert Onofrio, Melissa Parkin, Wendy Winckler, Kristin Ardlie, Stacey B Gabriel, Charles W M Roberts, Jaclyn A Biegel, Kimberly Stegmaier, Adam J Bass, Levi A Garraway, Matthew Meyerson, Todd R Golub, Dmitry A Gordenin, Shamil Sunyaev, Eric S Lander, and Gad Getz. Mutational heterogeneity in cancer and the search for new cancer-associated genes. *Nature*, 499(7457):214–218, 2013.
- Michael S Lawrence, Petar Stojanov, Craig H Mermel, James T Robinson, Levi A Garraway, Todd R Golub, Matthew Meyerson, Stacey B Gabriel, Eric S Lander, and Gad Getz. Discovery and saturation analysis of cancer genes across 21 tumour types. *Nature*, 505(7484):495–501, 2014.
- Janin Lehmann, Steffen Schubert, and Steffen Emmert. Xeroderma pigmentosum: diagnostic procedures, interdisciplinary patient care, and novel therapeutic approaches. *J. Dtsch. Dermatol. Ges.*, 12(10):867–872, October 2014.
- Monkol Lek, Konrad J Karczewski, Eric V Minikel, Kaitlin E Samocha, Eric Banks, Timothy Fennell, Anne H O'Donnell-Luria, James S Ware, Andrew J Hill, Beryl B Cummings, Taru Tukiainen, Daniel P Birnbaum, Jack A Kosmicki, Laramie E Duncan, Karol Estrada, Fengmei Zhao, James Zou, Emma Pierce-Hoffman, Joanne Berghout, David N Cooper, Nicole DeFlaux, Mark DePristo, Ron Do, Jason Flannick, Menachem Fromer, Laura Gauthier, Jackie Goldstein, Namrata Gupta, Daniel Howrigan, Adam Kiezun, Mitja I Kurki, Ami Levy Moonshine, Pradeep Natarajan, Lorena Orozco, Gina M Peloso, Ryan Poplin, Manuel A Rivas, Valentin Ruano-Rubio, Samuel A Rose, Douglas M Ruderfer, Khalid Shakir, Peter D Stenson, Christine Stevens, Brett P Thomas, Grace Tiao, Maria T Tusie-Luna, Ben Weisburd, Hong-Hee Won, Dongmei Yu, David M Altshuler, Diego Ardissono, Michael Boehnke, John Danesh, Stacey Donnelly, Roberto Elosua, Jose C Florez, Stacey B Gabriel, Gad Getz, Stephen J Glatt, Christina M Hultman, Sekar Kathiresan, Markku Laakso, Steven McCarroll, Mark I McCarthy, Dermot McGovern, Ruth McPherson, Benjamin M Neale, Aarno Palotie, Shaun M Purcell, Danish Saleheen, Jeremiah M Scharf, Pamela Sklar, Patrick F Sullivan, Jaakko Tuomilehto, Ming T Tsuang, Hugh C Watkins, James G Wilson, Mark J Daly, Daniel G MacArthur, and Exome Aggregation Consortium. Analysis of protein-coding genetic variation in 60,706 humans. *Nature*, 536(7616):285–291, August 2016.
- Kah Wai Lin, Ihor Yakymovych, Min Jia, Mariya Yakymovych, and Serhiy Souchelnyskyi. Phosphorylation of eEF1A1 at ser300 by T $\beta$ R-I results in inhibition of mRNA translation. *Curr. Biol.*, 20(18):1615–1625, September 2010.
- J G Lohr, P Stojanov, M S Lawrence, D Auclair, B Chapuy, C Sougnez, P Cruz-Gordillo, B Knoechel, Y W Asmann, S L Slager, A J Novak, A Dogan, S M Ansell, B K Link, L Zou, J Gould, G Saksena, N Stransky, C Rangel-Escareno, J C Fernandez-Lopez, A Hidalgo-Miranda, J Melendez-Zajgla, E Hernandez-Lemus, A Schwarz-Cruz y Celis, I Imaz-Rosshandler, A I Ojesina, J Jung, C S Pedamallu, E S Lander, T M Habermann, J R Cerhan, M A Shipp, G Getz, and T R Golub. Discovery and prioritization of somatic mutations in diffuse large b-cell lymphoma (DLBCL) by whole-exome sequencing. *Proceedings of the National Academy of Sciences*, 109(10):3879–3884, 2012.
- J Lykke-Andersen, M D Shu, and J A Steitz. Human upf proteins target an mRNA for nonsense-mediated decay when bound downstream of a termination codon. *Cell*, 103(7):1121–1131, December 2000.
- R Maesaki, K Ihara, T Shimizu, S Kuroda, K Kaibuchi, and T Hakoshima. The structural basis of rho effector recognition revealed by the crystal structure of human RhoA complexed with the effector domain of PKN/PRK1. *Mol. Cell*, 4(5):793–803, November 1999.
- Peng Mao, Alexander J Brown, Shingo Esaki, Svetlana Lockwood, Gregory M K Poon, Michael J Smerdon, Steven A Roberts, and John J Wyrick. ETS transcription factors induce a unique UV damage signature that drives recurrent mutagenesis in melanoma. *Nat. Commun.*, 9(1):2626, July 2018.
- Kendra Marcus and Carla Mattos. Direct attack on RAS: Intramolecular communication and Mutation-Specific effects. *Clin. Cancer Res.*, 21(8):1810–1818, April 2015.
- Iñigo Martincorena, Keiran M Raine, Moritz Gerstung, Kevin J Dawson, Kerstin



- Haase, Peter Van Loo, Helen Davies, Michael R Stratton, and Peter J Campbell. Universal patterns of selection in cancer and somatic tissues. *Cell*, 171(5):1029–1041.e21, 2017.
- Martin L Miller, Ed Reznik, Nicholas P Gauthier, Bülent Arman Aksoy, Anil Korut, Jianjiong Gao, Giovanni Ciriello, Nikolaus Schultz, and Chris Sander. Pan-Cancer analysis of mutation hotspots in protein domains. *Cell Syst*, 1(3):197–209, September 2015.
- J Mitsui and S Tsuji. Common Chromosomal Fragile Sites: Breakages and Rearrangements in Somatic and Germline Cells. *Atlas Genet. Cytogenet. Oncol. Haematol.*, (12), March 2012.
- M Nei and T Gojobori. Simple methods for estimating the numbers of synonymous and nonsynonymous nucleotide substitutions. *Mol. Biol. Evol.*, 3(5):418–426, September 1986.
- Jagruiti H Patel, Yanping Du, Penny G Ard, Charles Phillips, Beth Carella, Chi-Ju Chen, Carrie Rakowski, Chandrima Chatterjee, Paul M Lieberman, William S Lane, Gerd A Blobel, and Steven B McMahon. The c-MYC oncoprotein is a substrate of the acetyltransferases hGCN5/PCAF and TIP60. *Mol. Cell. Biol.*, 24(24):10826–10834, December 2004.
- Zhengdong Pei, Peter Fraisl, Johannes Berger, Zhenzhen Jia, Sonja Forss-Petter, and Paul A Watkins. Mouse very long-chain Acyl-CoA synthetase 3/fatty acid transport protein 3 catalyzes fatty acid activation but not fatty acid transport in MA-10 cells. *J. Biol. Chem.*, 279(52):54454–54462, December 2004.
- Erin D Pleasance, R Keira Cheetham, Philip J Stephens, David J McBride, Sean J Humphray, Chris D Greenman, Ignacio Varela, Meng-Lay Lin, Gonzalo R Ordóñez, Graham R Bignell, Kai Ye, Julie Alipaz, Markus J Bauer, David Beare, Adam Butler, Richard J Carter, Lina Chen, Anthony J Cox, Sarah Edkins, Paula I Kokko-Gonzales, Niall a Gormley, Russell J Grocock, Christian D Haudenschild, Matthew M Hims, Terena James, Mingming Jia, Zoya Kingsbury, Catherine Leroy, John Marshall, Andrew Menzies, Laura J Mudie, Zemin Ning, Tom Royce, Ole B Schulz-Trieglaff, Anastassia Spiridou, Lucy a Stebbings, Lukasz Szajkowski, Jon Teague, David Williamson, Lynda Chin, Mark T Ross, Peter J Campbell, David R Bentley, P Andrew Futreal, and Michael R Stratton. A comprehensive catalogue of somatic mutations from a human cancer genome. *Nature*, 463(7278):191–196, January 2010.
- Paz Polak, Rosa Karlic, Amnon Koren, Robert Thurman, Richard Sandstrom, Michael S Lawrence, Alex Reynolds, Eric Rynes, Kristian Vlahovicek, John A Stamatoyannopoulos, and Shamil R Sunyaev. Cell-of-origin chromatin organization shapes the mutational landscape of cancer. *Nature*, 518(7539):360–364, 2015.
- Rebecca C Poulos, Julie A I Thoms, Yi Fang Guan, Ashwin Unnikrishnan, John E Pimanda, and Jason W H Wong. Functional mutations form at CTCF-Cohesin binding sites in melanoma due to uneven nucleotide excision repair across the motif. *Cell Rep.*, 17(11):2865–2872, 2016.
- Margot R F Reijnders, Nurhuda M Ansor, Maria Kousi, Wyatt W Yue, Perciliz L Tan, Katie Clarkson, Jill Clayton-Smith, Ken Corning, Julie R Jones, Wayne W K Lam, Grazia M S Mancini, Carlo Marcelis, Shehla Mohammed, Rolph Pfundt, Maian Roifman, Ronald Cohn, David Chitayat, Deciphering Developmental Disorders Study, Tom H Millard, Nicholas Katsanis, Han G Brunner, and Siddharth Banka. RAC1 missense mutations in developmental disorders with diverse phenotypes. *Am. J. Hum. Genet.*, 101(3):466–477, September 2017.
- Radhakrishnan Sabarinathan, Loris Mularoni, Jordi Deu-Pons, Abel Gonzalez-Perez, and Nuria Lopez-Bigas. Nucleotide excision repair is impaired by binding of transcription factors to DNA. *Nature*, 532(7598):264–267, 2016.
- Morgan S Schrock and Kay Huebner. WWOX: A fragile tumor suppressor. *Exp. Biol. Med.*, 240(3):296–304, 2015.
- Tobias Sjöblom, Siân Jones, Laura D Wood, D Williams Parsons, Jimmy Lin, Thomas D Barber, Diana Mandelker, Rebecca J Leary, Janine Ptak, Natalie Silliman, Steve Szabo, Phillip Buckhaults, Christopher Farrell, Paul Meeh, Sanford D Markowitz, Joseph Willis, Dawn Dawson, James K V Willson, Adi F Gazdar, James Hartigan, Leo Wu, Changsheng Liu, Giovanni Parmigiani, Ben Ho Park, Kurtis E Bachman, Nickolas Papadopoulos, Bert Vogelstein, Kenneth W Kinzler, and Victor E Velculescu. The consensus coding sequences of human breast and colorectal cancers. *Science*, 314(5797):268–274, October 2006.
- Thomas C A Smith, Antony M Carr, and Adam C Eyre-Walker. Are sites with multiple single nucleotide variants in cancer genomes a consequence of drivers, hypermutable sites or sequencing errors? *PeerJ*, 4:e2391–e2391, 2016.
- John A Stamatoyannopoulos, Ivan Adzhubei, Robert E Thurman, Gregory V Kryukov, Sergei M Mirkin, and Shamil R Sunyaev. Human mutation rate associated with DNA replication timing. *Nat. Genet.*, 41(4):393–395, 2009.
- Michael R Stratton, Peter J Campbell, and P Andrew Futreal. The cancer genome. *Nature*, 458(7239):719–724, April 2009.
- Fran Supek, Belén Miñana, Juan Valcárcel, Toni Gabaldón, and Ben Lehner. Synonymous mutations frequently act as driver mutations in human cancers. *Cell*, 156(6):1324–1335, 2014.
- John Sutton. Gibrat's legacy. *J. Econ. Lit.*, 35(1):40–59, 1997.
- Jimmy Van den Eynden, Ana Carolina Fierro, Lieven P C Verbeke, and Kathleen Marchal. SomlnaClust: Detection of cancer genes based on somatic mutation patterns of inactivation and clustering. *BMC Bioinformatics*, 16(1):1–12, 2015.
- Donate Weghorn and Shamil Sunyaev. Bayesian inference of negative and positive selection in human cancers. *Nat. Genet.*, 49(12):1785–1788, 2017.
- Kangling Zhang, Francesco Faiola, and Ernest Martinez. Six lysine residues on c-myc are direct substrates for acetylation by p300. *Biochem. Biophys. Res. Commun.*, 336(1):274–280, October 2005.
